1 **High-resolution structures illuminate key principles underlying**  
2 **voltage and LRRC26 regulation of Slo1 channels**

3

4 Gopal S. Kallure<sup>1</sup>, Kamalendu Pal<sup>1</sup>, Yu Zhou<sup>2</sup>, Christopher J. Lingle<sup>2</sup> and Sandipan Chowdhury<sup>1\*</sup>

5

6 **Corresponding Author:**

7 \*Sandipan Chowdhury, [sandipan-chowdhury@uiowa.edu](mailto:sandipan-chowdhury@uiowa.edu)

8 **Affiliations:**

9 <sup>1</sup> Department of Molecular Physiology and Biophysics, University of Iowa Carver College of Medicine,  
10 Iowa City, IA, USA

11 <sup>2</sup> Department of Anesthesiology, Washington University School of Medicine, St. Louis, 63110, MO,  
12 USA.

13 **Abstract**

14

15 Multi-modal regulation of Slo1 channels by membrane voltage, intracellular calcium, and auxiliary  
16 subunits enables its pleiotropic physiological functions. Our understanding of how voltage impacts Slo1  
17 conformational dynamics and the mechanisms by which auxiliary subunits, particularly of the LRRC  
18 (Leucine Rich Repeat containing) family of proteins, modulate its voltage gating remain unresolved.  
19 Here, we used single particle cryo-electron microscopy to determine structures of human Slo1 mutants  
20 which functionally stabilize the closed pore (F315A) or the activated voltage-sensor (R207A). Our  
21 structures, obtained under calcium-free conditions, reveal that a key step in voltage-sensing by Slo1  
22 involves a rotameric flip of the voltage-sensing charges (R210 and R213) moving them by ~6 Å across a  
23 hydrophobic gasket. Next we obtained reconstructions of a complex of human Slo1 with the human  
24 LRRC26 ( $\gamma$ 1) subunit in absence of calcium. Together with extensive biochemical tests, we show that the  
25 extracellular domains of  $\gamma$ 1 form a ring of interlocked dominos that stabilizes the quaternary assembly of  
26 the complex and biases Slo1: $\gamma$ 1 assembly towards high stoichiometric complexes. The transmembrane  
27 helix of  $\gamma$ 1 is kinked and tightly packed against the Slo1 voltage-sensor. We hypothesize that  $\gamma$ 1 subunits  
28 exert relatively small effects on early steps in voltage-gating but structurally stabilize non-S4 helices of  
29 Slo1 voltage-sensor which energetically facilitate conformational rearrangements that occur late in  
30 voltage stimulated transitions.

31

## 32 Introduction

33 The Slo1 channel, alternately known as BK or MaxiK, underlies the large conductance, voltage  
34 and calcium regulated  $K^+$  selective currents<sup>1-5</sup>, that play key roles in diverse physiological processes such  
35 as neurotransmitter release and muscle contraction<sup>6,7</sup>. In higher organisms, the Slo1 channel associates  
36 with members of multiple families of auxiliary subunits<sup>8,9</sup>, which can differentially influence its voltage-  
37 dependent gating, calcium sensitivity and pharmacology. For instance, the product of the KCNMB2 gene,  
38 termed the  $\beta$ 2 subunit, confers fast inactivation characteristics on Slo1 currents<sup>10-12</sup> and reduces its  
39 sensitivity to the scorpion peptide toxin, charybdotoxin<sup>13</sup>. The  $\gamma$  subunits, consisting of members of a  
40 LRRC (Leucine Rich Repeat Containing) family of single pass transmembrane proteins, form a  
41 structurally distinct family of Slo1 auxiliary subunits. The founding member of this family of regulatory  
42 subunits, LRRC26 or  $\gamma$ 1, dramatically shifts the conductance-voltage (GV) relationship of Slo1 in the  
43 hyperpolarizing direction<sup>14</sup>, in nominally calcium free conditions. As a result, in cells such as secretory  
44 epithelia where Slo1 is partnered with  $\gamma$ 1, these complexes contribute to  $K^+$  flux under unstimulated,  
45 resting conditions<sup>15-17</sup>. A paralogous subunit, LRRC52 (or  $\gamma$ 2), associates with Slo1 channels in cochlear  
46 inner hair cells<sup>18</sup> and also with Slo3 channels in mammalian sperm contributing to K<sub>Sper</sub> currents which  
47 are critical for sperm capacitation<sup>19</sup>. Evolutionarily related LRRC55 and LRRC38 ( $\gamma$ 3 and  $\gamma$ 4 respectively)  
48 proteins, however, modulate Slo1 gating more modestly<sup>20</sup> and it remains unclear whether they are *bona*  
49 *fide* auxiliary subunits of Slo1.

50 Functional work on Slo1 effectively describes the dual regulation of channel opening by voltage  
51 and calcium with nested MWC-type allosteric models<sup>21-23</sup>. Structurally distinct parts of the protein, the  
52 voltage-sensing domain (VSD) and cytosolic calcium regulatory domains (CTD), each couple to a  
53 membrane-embedded domain containing the ion permeation pathway (or pore-gate domain, PGD) and  
54 alter its conformational bias when triggered by their cognate stimuli (membrane voltage changes or  
55 intracellular calcium). It is implicit that percolation of channels through the landscape underlying gating  
56 involves several structural intermediates. Auxiliary subunits further modify this landscape, either by  
57 introducing additional intermediate states or by changing the transition energy barriers<sup>24</sup>, ultimately  
58 resulting in their unique functional effects on channel gating.

59 Structures of multiple orthologs of Slo1<sup>25-28</sup> and its complex with the brain-specific  $\beta$ 4 subunit<sup>28</sup>  
60 have been determined in two key conditions. One of these captures Slo1 in the absence of divalent cations  
61 (the divalent-free DVF state), at presumed 0 mV, and the other in saturating concentrations of  $Ca^{2+}$ , with  
62 a presumed  $Ca^{2+}$  ion occupying each of the two distinct categories of high affinity  $Ca^{2+}$ -binding sites (the  
63 divalent bound DVB state)<sup>29</sup>. The structures have revealed vital details pertaining to the high conductance  
64 and calcium regulation of Slo1 channels. However, the structures of BK channels determined in the DVF

65 states (for the functionally well characterized orthologs) have generally been of lower resolution, which  
66 limit their use in threading decades of biophysical observations onto molecular structures<sup>30</sup>. Furthermore,  
67 given the strong thermodynamic linkage between voltage and calcium regulatory pathways in Slo1<sup>21,31,32</sup>,  
68 it remains unclear what aspects of the structural changes observed thus far arise solely from voltage  
69 gating as opposed to calcium regulation. Deconvolving voltage and calcium dependent structural changes  
70 of Slo1 will be pivotal to not only obtain a more granular view of its allosteric gating, but they will also  
71 be crucial to understand how the auxiliary subunits affect gating transitions linked to one or both stimuli.  
72 For instance, the  $\gamma 1$  subunit is thought to profoundly affect voltage-gating with relatively modest effects  
73 on calcium regulation<sup>14,33</sup> while  $\beta 1$  exerts robust effects on calcium-regulation<sup>34-36</sup> but has relatively  
74 smaller effects on voltage-gating.

75 Towards this goal, in this study we pursued multiple high-resolution reconstructions of Slo1  
76 under DVF conditions. First, using different mutant Slo1 channels which either stabilize a closed PGD or  
77 an activated VSD, we identify a key structural change in the VSD which we propose is critical for  
78 voltage-sensing. Second, we determine the structure of the hetero-octameric (4:4 stoichiometry) complex  
79 of Slo1 with  $\gamma 1$  (LRRC26) regulatory subunit. The architecture of the complex, together with extensive  
80 biochemical experiments, define key interactions and mechanisms that are central to the assembly of the  
81 complex. Guided by our structures and that of the previous DVB state, we hypothesize a mechanism that  
82 might underlie the functional effect of  $\gamma 1$  on the allosteric coupling of VSD activation to channel opening.

83

## 84 RESULTS

85

### 86 High resolution reconstructions of the hSlo1 channel mutants in presence of EDTA

87 For our structural studies we first targeted three Slo1 channel mutants which perturb its gating in  
88 three distinct ways (**Fig. 1A**). R207A neutralizes a positive charge on the exterior end of the S4 segment  
89 and shifts the conductance *vs* voltage (GV) curves of Slo1 leftward by >50 mV in the absence of  
90 intracellular calcium (**Fig. 1B and C**), although at 0 mV opening of R207A remains modest. This shift in  
91 gating is similar to that of other charge neutralizing mutations of this residue<sup>37-39</sup> and likely arises from  
92 stabilization of an activated conformation of the VSD. A second mutation in the S6 segment, F315A,  
93 exerts a relatively modest effect on voltage-sensor activation<sup>40</sup> but disfavors pore opening so profoundly  
94 that, at +100 mV, even in the presence of 300  $\mu$ M intracellular Ca<sup>2+</sup>, mutant channels reached a P<sub>O</sub> of only  
95 ~0.01 (**Fig. 1D and E**) while wild-type Slo1 under such conditions reached a P<sub>O</sub> of approaching 1. Given  
96 the two extremes of gating behavior exhibited by these two mutations, we anticipated that they may  
97 reveal structural differences that may occur while in DVF saline. The third mutant 2D2A/4D4A,

98 neutralizes calcium binding to the RCK1 site (D362A, D367A) and the Ca<sup>2+</sup> bowl (4D4A: <sup>894</sup>DDDD<sup>897</sup> to  
99 <sup>894</sup>AAAA<sup>897</sup>) and abolishes high affinity calcium regulation of Slo1 while minimally perturbing voltage-  
100 dependent gating in absence of calcium<sup>29</sup>. These 3 mutants (in the background of hSlo1<sub>EM</sub>) were  
101 expressed in mammalian cells as eGFP fusion constructs, purified in digitonin micelles by a combination  
102 of affinity and size exclusion chromatography, and subjected to single particle cryoEM analysis, in the  
103 presence of 5 mM EDTA. Reconstructions of each of the three mutants revealed single high resolution  
104 classes which, upon refinement (with C4 symmetry), yielded maps with GS-FSC resolutions of 2.43 Å  
105 (for F315A), 2.6 Å (for 4D4A/2D2A) and 2.72 Å (for R207A) (**Supplementary Fig. 1** and **Fig. 1F**). Due  
106 to the high quality of our maps, we were able to build and refine accurate atomic models of the full-length  
107 channel (**Fig. 1G** and **Supplementary Fig. 2A**). At the backbone level, the structures of all three mutants  
108 superposed well with each other (**Supplementary Fig. 2A**) with backbone RMSDs of ~1.0 Å. In our  
109 study we will refer to this quaternary configuration of the channel as the C state. Our models also match  
110 the earlier DVF state model of the hSlo1<sup>28</sup> at the backbone level (RMSD 1.63 Å) (**Supplementary Fig.**  
111 **2B**). However, we observed multiple non-protein densities in our reconstructions which provides  
112 mechanistic insights into the function of hSlo1.

113 In all three reconstructions, several detergent and native lipid molecules were found, glued to the  
114 outer periphery of hSlo1 (**Fig. 1F**). Three lipid molecules are in positions suggesting they are of key  
115 significance. The first of these (outer pore lipid) is wedged in an inter-subunit groove formed by the  
116 external end of S6 of one subunit and the P helix of the neighboring subunit (**Fig. 2A**). A similarly  
117 localized native lipid has been identified in EM reconstructions of other Kv channels<sup>41</sup> and might be  
118 stabilizing the outer pore. A second lipid molecule inserts its hydrophobic tail into an intra-subunit  
119 crevice (which we call the “medial crevice”) formed between the S5 and S6 helices (**Fig. 2A** and **B**). A  
120 third lipid guards a lateral fenestration between the S6 segments of two neighboring subunits, with its tail  
121 interacting with hydrophobic residues of the S6 segment and its headgroup tethered to a short stretch of  
122 positively charged residues (R329-K330-K331 or ‘RKK’ site) in the S6-RCK linker (**Fig. 2A** and **B**). In  
123 the divalent bound (DVB), open state of hSlo1<sup>28</sup>, the expansion of the S6 helices closes the medial crevice  
124 and the lateral fenestration. This requires the disengagement of these two lipid molecules from their  
125 respective binding sites. Hence both these lipid molecules preferentially bind and stabilize the C state of  
126 Slo1 and may regulate channel gating. Consistent with these inferences, MD simulations, complemented  
127 with functional experiments, have suggested that the interaction of the RKK site with phospholipid  
128 headgroups stabilizes the closed state of Slo1<sup>42</sup>. The lateral fenestration, a structural feature which has  
129 been observed in many homologous channels<sup>43-45</sup>, has also been suggested to form an access pathway for  
130 small molecules to enter the channel vestibule and regulate ion flux and channel gating. A similar  
131 mechanism is also possible in Slo1, but the guarding lipid would likely influence the accessibility and

132 action of such pharmacological modulators. Additional detergent densities are also observed in the inner  
133 pore in many of our final density maps (**Supplementary Fig. 2D**).

134 Like other  $K^+$  channels, densities for 4  $K^+$  ions are clearly visible (**Fig. 2C**) in the selectivity filter  
135 (S1-S4 sites) in all three of our reconstructions. A weaker density for a hydrated  $K^+$  ion at the S0 site is  
136 also observed. Behind the selectivity filter, we noted pseudo-spherical densities in the sharpened map for  
137 the F315A mutant (**Fig. 2C**). The positions of two of these densities closely match those of water  
138 molecules reported in the high-resolution crystal structures of prokaryotic  $K^+$  channels such as MthK and  
139 KcsA (**Supplementary Fig. 2E**). In KcsA these water molecules have been proposed to regulate  
140 inactivation gating associated with selectivity filter dynamics<sup>46</sup>. Although Slo1 channels are not known to  
141 intrinsically undergo such a process, mutations of side chains coordinating the water densities (D292,  
142 Y290 in the selectivity filter and Y279 in the P-helix) profoundly affect its ion conductance and gating<sup>47-</sup>  
143 <sup>49</sup>. Biochemically, size exclusion chromatography profiles of purified hSlo1 mutants, wherein these sites  
144 are perturbed by relatively mild substitutions (D292N and Y279F), show a robust destabilization of  
145 channel tetramers (**Supplementary Fig. 2F**). Furthermore, while in our preparative conditions, hSlo1  
146 tetramers are comparably stable in low and high  $K^+$  (2.5 and 500 mM respectively) buffers, the two  
147 mutants show enhanced disassembly in low  $K^+$  buffers. Thus, this network of protein-water interactions  
148 regulates the stability and  $K^+$  ion interactions of the selectivity filter of hSlo1.

149 Close inspection of the high affinity  $Ca^{2+}$  binding sites in the F315A and R207A maps  
150 surprisingly showed clear ion densities (**Fig. 2D**), despite the presence of EDTA. The RCK1 density is  
151 tetrahedrally coordinated by backbone carbonyls of residues N509, S512, V532 and N534. It does not  
152 engage sidechains of D367 and E535, the principal determinants of  $Ca^{2+}$  binding at that locus<sup>27,50</sup>. An  
153 identically coordinated ion density at the RCK1 site is also seen in the 2D2A/4D4A map. Thus, it is  
154 unlikely to be a  $Ca^{2+}$  ion but could correspond to a  $K^+$  ion since it was the dominant cation in our buffers.  
155 The mean ion-O distances obtained from our refined models is 2.9 Å, matching the most frequent oxygen  
156 coordination distances for a  $K^+$  ion<sup>51</sup>. This ion is ~5 Å away from the RCK1  $Ca^{2+}$  coordination site.  
157 Through coulombic forces, it might influence the  $Ca^{2+}$  affinity as well as the divalent specificity of the  
158 RCK1  $Ca^{2+}$  site. Larger divalents (such as  $Ba^{2+}$ ) would be repelled by the monovalent ion more strongly  
159 than smaller divalents (such as  $Ca^{2+}$  or  $Cd^{2+}$ ) perhaps explaining why RCK1 is more selective for the  
160 latter<sup>52,53</sup>.

161 The density in the Ca-bowl, while clear in the F315A and R207A maps (**Fig. 2D**), vanishes in the  
162 2D2A/4D4A map. It is coordinated by the side chain of N449 of one subunit and, from the adjacent  
163 subunit, the backbone carbonyls and side chains of residues in the acidic loop (residues 892-900) which  
164 are known to be involved in  $Ca^{2+}$  binding. The acidic loop in the DVB state contracts around the  $Ca^{2+}$   
165 density<sup>28</sup> but in our models for F315A and R207A it is somewhat more relaxed and adopts a significantly

166 different configuration in the 2D2A/4D4A mutant (**Supplementary Fig. 2B**). Additionally, D897, which  
167 is one of the two most critical residues for Ca<sup>2+</sup> binding at this site<sup>54</sup>, is twisted away from the Ca<sup>2+</sup>-bowl  
168 density in our F315A and R207A models. Thus, this density could represent a Ca<sup>2+</sup> ion originating from  
169 contaminants in our buffers or inadvertently deposited by ash-fabricated filter papers used for plunge-  
170 freezing EM. Alternately, it could represent a K<sup>+</sup> ion, which would suggest a competition between K<sup>+</sup> and  
171 Ca<sup>2+</sup> for this site. Although interactions with K<sup>+</sup> will likely be of low affinity, in a cellular milieu K<sup>+</sup> is  
172 orders of magnitude more abundant than Ca<sup>2+</sup>. Although more structural and functional investigations will  
173 be necessary to resolve this puzzle, we note that resolution of structures will be critical to resolve putative  
174 monovalent occupancies.

175

### 176 **Configuration of S4 charges in R207A, F315A and 2D2A/4D4A**

177 Gating charge displacement vs voltage (QV) curve measurements have indicated that, at 0 mV,  
178 charge neutralizing mutants of R207 bias their VSDs towards their activated conformations<sup>38</sup> while in  
179 F315A and 2D2A/4D4A the VSDs should prefer their resting conformations<sup>32,40</sup>. Yet at the backbone  
180 level the VSDs of all three mutants are superimposable (**Supplementary Fig. 2A**). However, a close  
181 inspection of the S4 charges reveals a striking difference (**Fig. 3A**). In F315A (and 2D2A/4D4A  
182 (**Supplementary Fig. 3a**)), the side chain of R207 is flipped upward, while that of R210 is featured right  
183 next to the conserved Phe residue in S2 (F160) and R213 is flipped downward. F160 forms the core of the  
184 hydrophobic gasket that intercepts the water accessible crevices within the VSD and focuses the electric  
185 field<sup>55,56</sup>. R210, being placed at the same level as F160, effectively seals this hydrophobic barrier and  
186 separates the interior from the exterior VSD crevices. However, in the VSD of R207A, the side chains of  
187 R210 and R213 each flip upward by ~ 6 Å, such that R210 is housed in the external crevice and R213  
188 moves out of the internal crevice and plugs the hole in the hydrophobic gasket. This suggests that the  
189 focused electric field is likely to be centered around the F160 position<sup>38</sup> and the movement of R210 and  
190 R213 sidechains displace gating charges. Between the two charge configurations, the distances between  
191 the gating charges (R210 and R213) and negatively charged residues (particularly D186 and D153) lining  
192 the VSD crevice walls (in S1-S3) (**Fig. 3A**) change significantly. The changes in these interactions likely  
193 define the potential endpoints of the landscape of VSD activation. We propose that the VSDs of the  
194 mutants F315A and 2D2A/4D4A represent the resting state of hSlo1 VSD while that of R207A represents  
195 the activated state, respectively. VSD activation of Slo1 thus involves side-chain re-orientations of two S4  
196 charges through a focused electric field and follows the “transporter model” of activation<sup>57-59</sup>. It is  
197 important to mention that in the previous DVF state models of Slo1<sup>25,28</sup> the side chain orientations of the  
198 S4 charges were poorly constrained (**Supplementary Fig. 3B and C**) by the density maps due to their



199 relatively low resolution, while in our study the high resolution maps enable us to make these precise  
200 structural inferences.

201 Comparison of the activated VSD of R207A with that of VSD of the DVB state<sup>28</sup> (ref) shows that  
202 the gating charges (R210 and R213) are oriented similarly (**Fig. 3B**). However, in the latter, the C-  
203 terminal, intracellular end of S4 bends inward by  $\sim 18^\circ$ , towards the internal end of S1. This transition  
204 likely occurs after gating charge movement. In concert with or following this, the S4-S5 linker moves  
205 facilitating the expansion of S6 helices. Between the activated VSDs of R207A and DVB states, the  
206 intracellular end of S1 also rotates by  $\sim 9^\circ$  and the short linker connecting S1 to the pre-S1 helix also  
207 readjusts. As a result of these changes, F223 at the intracellular end of S4, becomes more effectively  
208 packed against the pre-S1:S1 linker in the DVB state relative to the C state of R207A (**Fig. 3C**). F233 has  
209 been suggested as a critical determinant of electromechanical coupling in Slo1<sup>60</sup>. Several perturbations in  
210 the C-terminal end of S4 have also been proposed to compromise allosteric coupling between the VSD  
211 and the pore<sup>37,38,61</sup>. Additionally, Mg<sup>2+</sup> binding has been shown to favor channel opening by strengthening  
212 electromechanical coupling<sup>62-65</sup>. While the pre-S1 helix might ordinarily be dynamic, Mg<sup>2+</sup> binding  
213 (regulated by D99 in the preS1 helix, N172 in intracellular loop linking S2-S3 helices and E374/E399 on  
214 the RCK1 N-lobe) likely makes it more rigid and effectively engage the intracellular end of S4. Together,  
215 these structure-function correlations hint towards an important role of the inner ends of VSD helices in  
216 facilitating expansion of the inner ends of the S6 helix, in the later steps of voltage gating.

217

## 218 **Architecture of the Slo1-LRRC26 complex**

219 Voltage-dependent activation of Slo1 is dramatically facilitated by the LRRC26 (or  $\gamma 1$ ) subunits<sup>14</sup>  
220 (**Fig. 4A** and **Supplementary Fig. 5A,B**) and we wondered whether  $\gamma 1$  might influence VSD status in  
221 DVF conditions. To understand the structural principles underlying Slo1- $\gamma 1$  assembly and the  
222 mechanisms by which  $\gamma 1$  modulates Slo1 gating, we performed single particle reconstructions of  
223 hSlo1:LRRC26 complex in presence of 5 mM EDTA (**Supplementary Fig. 4A**). We initially obtained a  
224 reconstruction of the complex where the extracellular density for the LRR domains was relatively weak  
225 (**Fig. 4B**). The corresponding map was further refined by masking out the extracellular Leucine Rich  
226 Repeat Domain (or LRRDs), to obtain a 3.1 Å reconstruction of the complex, where densities for  $\gamma 1$   
227 transmembrane segments were clearly visible (**Fig. 4A** and **Supplementary Fig. 5C**). In an alternate  
228 workflow, the density for the intracellular gating ring was masked out and reconstruction analyses  
229 resulted in a single C4 symmetric class of the 4:4 complex of hSlo1<sub>EM</sub>- $\gamma 1$  at a GS-FSC resolution of 3.13  
230 Å where the LRRD and TM (transmembrane segment) of  $\gamma 1$  were clearly resolved (**Fig. 4C** and  
231 **Supplementary Fig. 5C**).



232 In the quaternary complex, the LRRDs of the four  $\gamma 1$  subunits are organized as a ring of  
233 “interlocked dominos” (**Fig. 4C**). The ring is 45 Å thick along the membrane normal and lies ~ 9 Å above  
234 the membrane. Along the membrane plane, the external edge (or outer rim) of the LRRD ring is ~ 65 Å  
235 long. A central gap (~24 Å in lateral dimension) in the LRRD layer directly connects the external milieu  
236 to the channel pore. The LRRD ring features modest surface electrostatic characteristics (**Fig. 4D**). Its  
237 outer surface (parallel to the membrane), directed away from the channel, is somewhat electronegative  
238 while the outer and inner rims (perpendicular to the membrane) are slightly electropositive. Each LRRD  
239 is shaped like a curved solenoid comprising six Leucine Rich Repeat Motifs or LRRMs 1-6, each forming  
240 a  $\beta$ -turn- $\alpha$  loop (**Fig. 4E**). Two additional LRRMs, LRRM-NT and LRRM-CT, flank the core LRRMs 1-  
241 6 on the N and C terminal ends, respectively. LRRM-NT and LRRM1-2 of one subunit form an interface  
242 with LRRM-CT and LRRM6 of the neighboring subunit burying ~550 Å<sup>2</sup> of molecular surface between  
243 them (**Fig. 4E**). The LRRDs do not contact the Slo1 channel, except for the LRRM-CT which interacts  
244 with the extracellular N-terminus of Slo1 (**Fig. 4E and F**), consistent with the results of LRET  
245 measurements<sup>66</sup>. A structural consequence of this interaction is that 7-8 residues of the Slo1 N-terminus,  
246 which were invisible in the reconstructions of the Slo1 mutants, become ordered and visible in the  $\gamma 1$   
247 complex. We also note a clear bump at N147 in our map (**Fig. 4C**), likely corresponding to glycosylation.  
248 N147 is on the external surface of LRRD, directed away from the channel and the membrane. In the  
249 absence of glycosylation of  $\gamma 1$ , gating shifts are not observed<sup>67</sup>, but it is not known whether this is a lack  
250 of function or assembly.

251 The transmembrane helix of the  $\gamma 1$  subunit interacts intimately with the VSD of Slo1. It is kinked  
252 on the extracellular side around residues 269-273 (**Fig. 4F and Supplementary Fig. 5D**). Above the kink,  
253 the helix fits into a groove formed by the extracellular ends of the S0 and S3 helices of Slo1 (**Fig. 4F and**  
254 **Supplementary Fig. 5E**). Below the kink, the  $\gamma 1$  transmembrane helix leans against the S2 and pre-S1  
255 helices. The transmembrane helices of hSlo1 in this complex are identical to that in the C state, with the  
256 voltage-sensing R210 and R213 rotamers in a downward flipped state, representing a resting VSD (**Fig.**  
257 **4F**). Interestingly, the kink in the  $\gamma 1$ -TM is positioned intimately next to Slo1 residues (for example, F160  
258 and D186) that are critical for its voltage dependent activation (**Fig. 4G and Supplementary Fig. 5E**).  
259 The quaternary arrangement of gating ring, as inferred from the LRRD masked map, matches that of the  
260 C state (for the Slo1 mutants) (**Supplementary Fig. 5C**). Density corresponding to the C-terminal end of  
261 the  $\gamma 1$  subunit (residues 294-330) was not visible in our maps indicating that in this conformational state it  
262 is likely to be relatively flexible.

263

264  **$\gamma 1$ -TM kink is critical for assembly and regulation of Slo1**

265 Co-expression of hSlo1EM and  $\gamma 1$  as eGFP and mCherry fusion constructs allowed us to use  
266 Dual Color Fluorescence Size Exclusion Chromatography (DC-FSEC)<sup>68,69</sup> together with a two-step  
267 affinity purification process to probe the regions of  $\gamma 1$  that are central for its assembly with Slo1  
268 (**Supplementary Fig. 6A-C, Fig. 5A and B**). Under our expression and purification conditions about  
269 ~50% of total Slo1 is in complex with  $\gamma 1$ . In comparison, >90% of total Slo1 forms a complex with  $\beta 4$   
270 and  $\beta 2$  subunits (**Fig. 5B**). The efficiency of assembly of the four homologous  $\gamma$  subunits followed the  
271 rank order  $\gamma 1 > \gamma 2 > \gamma 3 \sim \gamma 4$ . For  $\gamma 3$  and  $\gamma 4$ , hSlo1EM- $\gamma$  complexes comprised <10% of total Slo1  
272 expressed. We also compared the assembly efficiencies of two chimeric  $\gamma$  subunits. The chimera,  $\gamma 13$   
273 (LRRD from  $\gamma 1$ ; TM and C-terminus from  $\gamma 3$ ) assembled poorly with hSlo1EM (at levels similar to WT  
274  $\gamma 3$ ) while  $\gamma 31$  (LRRD from  $\gamma 3$ ; TM and C-terminus from  $\gamma 1$ ) assembled much more efficiently (almost  
275 like  $\gamma 1$ ) (**Fig. 5B**). Thus the  $\gamma$ -TM segment strongly favors formation of the Slo1- $\gamma$  complex.

276 Additional mutants that were tested replaced specific residues of  $\gamma 1$ -TM with corresponding  
277 residues in  $\gamma 3$  (**Fig. 5A**). Most of them minimally or modestly perturbed assembly with Slo1  
278 (**Supplementary Fig. 6D**). The clear exceptions were P270F and F273S which dramatically reduced  
279 complex formation (**Fig. 5B**). Both residues are located at the kink of the transmembrane segment. The  
280 side chain of  $\gamma 1$  F273 occupies a hydrophobic pocket formed by Slo1 channel residues, L161, F164 and  
281 F187 (on S2 and S3), and  $\gamma 1$  P270 is close to the sidechain of T32 (on S0) possibly connected via a  
282 hydrogen bond (**Fig. 5A**). These two  $\gamma 1$  mutants likely destabilize the kink or disrupt the local intimate  
283 packing with Slo1 and highlight the structural importance of the kink. Two additional mutants targeted  
284 the C-terminal end of the  $\gamma 1$ -TM, deleting multiple positively charged residues (**Fig. 5A**). These mutants  
285 also robustly compromised the ability of  $\gamma 1$  to associate with Slo1 (**Fig. 5B and Supplementary Fig. 6D**).  
286 This region of  $\gamma 1$  comes close to the pre-S1 helix of Slo1 (**Fig. 4D**) but due to the limited density in this  
287 structural region, we are unable to ascertain specific structural contacts. Positively charged residues at the  
288 ends of a TM facilitate its membrane integration due to interaction with phospholipid head groups<sup>70,71</sup>.  
289 Thus, it is possible that the charge cluster of  $\gamma 1$  affects its association with Slo1, by influencing the  
290 insertion or orientation of the  $\gamma 1$ -TM in membranes. Some  $\gamma 1$  mutants studied here produce much smaller  
291 shifts in Slo1 GV's relative to WT- $\gamma 1$ <sup>72,73</sup>. It has been unclear to what extent the loss of function arises  
292 from disruption of allosteric linkage between  $\gamma 1$  and Slo1 or the inhibition of complex formation. This is  
293 reminiscent of the "binding-gating conundrum" for ligand gated channels<sup>74</sup>, where a mutation can thwart  
294 ligand dependent channel opening by inhibiting ligand binding or severing allosteric linkage between  
295 ligand binding and downstream conformational changes. The S272V mutation (also featured at the  $\gamma 1$ -TM  
296 kink) is an exception. Our experiments show that it assembles with Slo1 as efficiently as (if not slightly  
297 better than) WT- $\gamma 1$  while previous functional results have shown that it substantially reduces shifts in

298 Slo1 GVVs relative to WT- $\gamma 1$ <sup>72</sup>. Hence, an intact  $\gamma 1$ -TM kink is critical both for  $\gamma 1$  assembly and its  
299 modulatory effects.

300

301

302

### 303 **Role of LRRDs in complex assembly**

304 The ratio of the eGFP:mCherry fluorescence intensity ( $\rho_{GC}$ ) of the doubly affinity purified Slo1-  
305  $\gamma 1$  complexes allowed us to infer their average stoichiometries (see Methods). The specific value of  $\rho_{GC}$   
306 was calibrated to defined stoichiometries using a control dimeric protein and purified free mCherry and  
307 eGFP (see Methods). Based on this, we found that under our experimental conditions, the average  
308 stoichiometry of purified Slo1- $\gamma 1$ , Slo1- $\beta 2$  and Slo1- $\beta 4$  complexes was 4:4 (**Fig. 5B**). Across all  $\gamma$   
309 variants tested in this study, the inferred stoichiometry was similar, except for P270F, where it was ~4:2.4  
310 indicating that under specific conditions Slo1- $\gamma 1$  can form complexes with fewer than 4  $\gamma 1$  subunits.

311 In many of the  $\gamma 1$  mutants, which poorly assembled with Slo1 (Slo1 in complex was  $< \sim 10\%$  of  
312 total Slo1), the stoichiometry of the purified complexes were inferred to be 4 Slo1:  $> 4 \gamma$ . This is  
313 unexpected and could potentially reflect improperly assembled complexes. But why is there such a  
314 preference for high stoichiometric states? Slo1- $\gamma 1$  complexes have been proposed to assemble into four  
315  $\alpha$ : $\gamma 1$  stoichiometric combinations<sup>9,75,76</sup>. If all the combinatorial assemblies were equally likely or if a  
316 single copy of the  $\gamma 1$  subunit assembled with Slo1 tetramers independent of another, then we would've  
317 expected the average stoichiometry to decrease (4 Slo1:  $< 4 \gamma$ ) in mutants where the efficiency of  
318 assembly is reduced. One possible structural explanation underlying this stoichiometric bias could be that  
319 the LRRDs interact with each other (as seen in the structure) and this favors complexes with two or more  
320  $\gamma$  subunits. Such a hypothesis would demand that the LRRDs have an intrinsic tendency to interact with  
321 each other, possibly even in absence of Slo1. To test this,  $\gamma 1$ -4 subunits were expressed individually as  
322 mCherry fusions without Slo1, affinity purified in L-MNG micelles, and examined via FSEC (**Fig. 5C**  
323 and **Supplementary Fig. 5H**). A broad peak corresponding to polydisperse, high order oligomer(s) was  
324 observed in all four cases. For  $\gamma 2$ -4, a second relatively sharper peak corresponding to a lower order  
325 oligomer was also seen. For  $\gamma 3$ , the species corresponding to smaller oligomeric peak was further  
326 analyzed by mass photometry<sup>77</sup> (**Fig. 5C**). The mass of this protein-detergent complex, measured before  
327 and after release of the mCherry tag, indicated a net reduction of 125 kDa due to tag release. Considering  
328 each tag is  $\sim 29$  kDa, the result indicates that the corresponding  $\gamma 3$  species most likely corresponds to a  
329 tetramer or a mixture of tetramer and pentamer. The LRRDs of  $\gamma 1$ -4 (TM and C-terminal ends deleted),  
330 when expressed and purified, are polydisperse showing various degrees of oligomerization

331 **(Supplementary Fig. 5I)**. Both experiments support intrinsic homomeric interaction between the LRRDs  
332 of  $\gamma 1$ -4. These experiments, however, do not clarify if the self-interactions between the LRRDs are  
333 important for  $\gamma 1$  assembly with Slo1 tetramers.

334 The structure of the Slo1: $\beta 4$  complex shows that the 2 TM segments of  $\beta 4$  associate with the  
335 channel, each at a different location than the  $\gamma 1$ -TM (**Fig. 5D**)<sup>28</sup>. This raises the possibility that  $\gamma 1$ -TM and  
336  $\beta 4$ -TMs could be accommodated in the same complex. Previous functional work has provided two  
337 differing answers to this question. Whereas in HEK or LNCaP cells co-expression of  $\beta 1$  subunit  
338 substantially reduced or eliminated the  $\gamma 1$ -mediated shift effect<sup>14,78</sup>, it was also observed that  $\beta 2$  and  $\gamma 1$   
339 can both mediate subunit specific functional effects in single BK channels when co-expressed in  
340 oocytes<sup>79</sup>. We therefore asked whether a ternary complex containing the large extracellular loop between  
341 the 2 TMs of the  $\beta$  subunits would structurally clash with and possibly disassemble the ring of LRRDs.  
342 To test this, we co-transfected Slo1-eGFP with  $\gamma 1$ -mCherry (plasmid weight transfection ratio of 1:2)  
343 together with different amounts of  $\beta 4$ , with a His tag on its C-terminus. Following the same biochemical  
344 strategy as before, we observed that the fraction of Slo1 in complex with  $\gamma 1$  decreased with increasing  
345 levels of co-transfected  $\beta 4$  cDNA (**Fig. 5F** and **Supplementary Fig. 6E**). Interestingly  $\rho_{GC}$  in the purified  
346 complexes slightly increased with increasing amount of transfected  $\beta$  subunits suggesting that in these  
347 complexes tetrameric Slo1 possibly assembles with fewer than 4  $\gamma 1$  subunits. At the highest amount of  $\beta 4$   
348 tested, the inferred average stoichiometry was 4 Slo1: 3.5  $\gamma 1$ . Similar results were obtained with  $\beta 2$ . We  
349 were not able to confirm whether Slo1,  $\beta 2/4$  and  $\gamma 1$  formed a ternary complex because of non-specific  
350 interactions of Slo1 or  $\gamma 1$  with the His-tag (on  $\beta$  subunit) affinity capture resin (but inspection of the  
351 FSEC profiles of the  $\gamma 1$ -free and  $\gamma 1$ -containing complexes suggest that the  $\beta$ - and  $\gamma$ -subunits might prefer  
352 to segregate into different complexes **Supplementary Fig. 6F** and **G**). The implication of these results is  
353 that although the TMs of  $\gamma 1$  and  $\beta$  interact with Slo1 at non-interfering interfaces, the clash between the  
354 LRRD ring and the extracellular loop impedes their simultaneous association. This suggests that, if the  
355 structural interaction between the LRRDs is disrupted, it impedes the ability of  $\gamma 1$  to associate with Slo1.  
356 Consistent with this, deletion of the LRRD segments or replacing it with unrelated globular domains in  
357 the context of  $\gamma 1$  alters the functional effects of mutant subunits<sup>67</sup> probably due to aberrant  
358 assembly. Designer constructs, in which the  $\gamma 1$ -TM replaces the second transmembrane helix of  $\beta$   
359 subunits, are however able to efficiently assemble with and modulate Slo1, even without the LRRD<sup>67,75</sup>.  
360 Thus, while the LRRDs are important for the association of native  $\gamma$  subunits with Slo1, they are likely  
361 vestigial for their modulatory functions. Furthermore, the role of LRRDs in chaperoning the Slo1: $\gamma 1$ -TM  
362 union can be fulfilled by other engineered protein modules. Overall, we propose a model for Slo1: $\gamma 1$

363 assembly in which the initial association of a single  $\gamma$  subunit with a Slo1 tetramer is driven by the  
364 interaction of its TM with the non-S4 helices of Slo1-VSD. Thereafter, the association of the second  $\gamma$   
365 subunit becomes more favorable due to the interaction between the two LRRDs (**Fig. 5G**) and this  
366 possibly underlies the bias towards the high stoichiometric states. Thus, the association of the multiple  
367 copies of  $\gamma$ 1 subunit with Slo1 is not independent and likely follows a non-binomial, cooperative model.  
368 Our results and model do not exclude the possibility that channels with less than 4  $\gamma$ 1 subunits may form  
369 for instance under conditions of very low  $\gamma$ 1 expression<sup>9,75,76,79</sup>.

## 370 **DISCUSSION**

371 Over the last several decades substantive efforts, combining electrophysiological, spectroscopic<sup>80-</sup>  
372 <sup>82</sup>, and chemical-biological<sup>83,84</sup> methods, have been invested to decipher how Slo1 VSDs sense membrane  
373 voltage and regulate channel opening and how this process is influenced by the quaternary gating ring.  
374 The structures of Slo1 reported until now have provided a foundation to start connecting many of these  
375 dots. Yet due to the limited resolution of the single resolved conformation of Slo1 under DVF conditions,  
376 central questions regarding voltage-gating remained unanswered.

377

### 378 **VSD activation in Slo1 channels**

379 Here, we determined high resolution structures of human Slo1 mutants which dramatically  
380 change the conformational bias of Slo1 (at 0 mV and nominally calcium free conditions) to VSD-  
381 resting/Pore-closed or VSD-active/Pore-closed states. Comparison of these structures show that rotameric  
382 flipping of key S4 arginines (R210 and R213) displaces their positively charged guanidium moieties by  
383  $\sim 6$  Å through a focused electric field without virtually any discernable change in the S4 helix. These  
384 changes are reminiscent of the voltage-sensing mechanism proposed for the voltage-sensing  
385 phosphatase<sup>85,86</sup>, where a small vertical displacement of the S4 together with rotameric flips of S4  
386 arginines were observed between structures of a Fab-stabilized resting VSD and a mutant stabilizing the  
387 active VSD.

388 This small sidechain movement in Slo1 might be sufficient to account for the ultra-fast gating  
389 currents observed in the functionally well-characterized orthologs of Slo1<sup>87</sup> (refs). Our observed changes  
390 would also be consistent with the emergence of the omega- or gating-pore currents in a charge neutralized  
391 Slo1 mutant (R210H)<sup>38</sup>. Since R210 plugs the hydrophobic gasket in the resting state, ions are prevented  
392 from passing through a resting VSD, possibly via coulombic repulsion. In contrast, when R210 is  
393 neutralized in R210H, this might enable cations to pass through when the VSD is resting as a  
394 consequence of an altered electrostatic environment around the 210 site. Upon VSD activation, R213 then  
395 plugs the gasket and turns off ion flux. These structural inferences line up with the transporter model of

396 voltage-sensor activation<sup>57,58,88</sup>. While the latter model was originally proposed in the context of Shaker  
397 K<sub>V</sub> channels, direct structural evidence of this proposal had been lacking until structures of the TPC1  
398 channel revealed multiple conformations of their VSDs<sup>89</sup>. These defined a probable sequence of  
399 transitions in the VSDs, mimicking the conformational transitions of transporters accompanying substrate  
400 transport. Our structural observations with Slo1 reinforce this hypothesis and contrasts Slo1 from other  
401 voltage-gated channels where the dynamics of movement of S4 helices can be substantially larger<sup>90</sup>.

402 Our results also provide information pertinent to the identities of voltage-sensing residues in Slo1.  
403 While a recent study argued that R210 and R213 are the primary gating charges<sup>38</sup>, an earlier study  
404 reported that R213 (but not R210) and negatively charged residues in S2/S3 segments<sup>37</sup> contribute to  
405 gating charge movement. While our results appear to be more consistent with the first hypothesis, the  
406 boundaries of the focused electric field would need to be properly defined to infer the contribution of the  
407 specific charge movement associated with the rotamer flip at each position to the total gating charge.

408

#### 409 **The assembly of Slo1:LRRC26 complexes**

410 To stabilize and thereby structurally trap conformational intermediates during voltage-activation  
411 Slo1, we determined the Ca<sup>2+</sup>-free structure of the hSlo1:hLRRC26 ( $\gamma$ 1) complex which open at much  
412 lower depolarizations than WT hSlo1. Under our conditions of reconstruction,  $\gamma$ 1 appears to have little  
413 effect on the structure of Slo1 except for a modest change in the position of the pre-S1 helix  
414 (**Supplementary Fig. 5C**). Nevertheless, our structural and biochemical experiments revealed two key  
415 principles involving Slo1:  $\gamma$ 1. First, the single TM of  $\gamma$ 1 features a kink that is possibly stabilized by  
416 intramolecular H-bonds and is intimately packed against non-S4 helices of the VSD. Under our  
417 experimental conditions, mutations at this locus (P270 and F273) dramatically affect the efficiency of  $\gamma$ 1  
418 to assemble with Slo1. Consistent with this idea, two  $\gamma$ 1 paralogs ( $\gamma$ 3 and  $\gamma$ 4) which natively feature  
419 dramatic substitutions at this locus, assemble very poorly with Slo1. We note that, under heterologous  
420 expression conditions, the rank order of assembly of the four  $\gamma$  paralogs parallel the order of shifts in Slo1  
421 GV<sub>s</sub> observed when they are individually co-expressed with Slo1<sup>20</sup>. It remains somewhat unclear to what  
422 extent the differences in these functional effects may arise from differences in assembly efficiencies or  
423 modulatory potencies. The impact of modified assembly must be appropriately considered in future  
424 mechanistic explorations of Slo1 regulation by  $\gamma$ 1 via mutational analyses. A second important aspect of  
425 the Slo1:  $\gamma$ 1 assembly that we discovered is the impact of LRRDs. These extracellular domains form a  
426 ring of interlaced dominos on top of the channel and the interactions between these domains bias Slo1:  $\gamma$ 1  
427 complexes towards high stoichiometric states. We hypothesize, therefore, that  $\gamma$ 1 assembles with Slo1  
428 cooperatively such that under heterologous expression conditions there would be a preponderance of



429 channels in the 4:4 or 4:3 stoichiometric states. Under specific situations, however, low stoichiometric  
430 complexes (fewer than 4  $\gamma$  subunits) may also form (such as in the case of the P270F mutant or upon co-  
431 expression of  $\beta$  subunits). To date, the best direct functional evidence in support of the formation of such  
432 “sub-stoichiometric” complexes comes from the exploration of Slo1 modulation by a  $\beta$ 2- $\gamma$ 1 chimeric  
433 construct<sup>75</sup>, which lacks the LRRD.

434 The importance of the LRRD interactions in the overall complex assembly is further highlighted  
435 by an overall decrease in isolated Slo1- $\gamma$ 1 complexes in the presence of  $\beta$  subunits. Our analysis suggests  
436 that this might arise from a structural clash between the extracellular domains of  $\beta$  and  $\gamma$ . While our  
437 biochemical results would be consistent with the dramatic reduction of  $\gamma$ 1-induced shifts of Slo1 GV  
438 when  $\beta$ 1 is co-expressed in HEK and LNCaP cells, they contrast with functional observations of a ternary  
439 complex with Slo1:  $\gamma$ 1:  $\beta$ 2 in RNA-injected *Xenopus* oocyte membranes. The formation of such a  
440 complex would either need to have fewer than 4  $\beta$  and/or  $\gamma$  subunits or would require large  
441 rearrangements of their extracellular domains (relative to what we know from currently available  
442 structures, as discovered in our study and previous studies on Slo1- $\beta$ 4). Further electrophysiological and  
443 biochemical studies will be necessary to resolve this dichotomy.

444 The proposed cooperativity in assembly conferred by the LRRD domain also has implications for  
445 the previously noted all-or-none gating behavior conferred by LRRC26 on Slo1 channels<sup>75,76</sup>. In contrast  
446 to effects of Slo1  $\beta$  subunits which incrementally shift gating as mole fraction of expressed  $\beta$ :Slo1 is  
447 increased<sup>91</sup>, increases in  $\gamma$ 1:slo1 expressed ratio show only a changing ratio of fully shifted and unshifted  
448 population of channels<sup>76</sup>. Initial evaluations noted that this could arise either from two types of models:  
449 first, in which differing  $\gamma$ 1:Slo1 stoichiometries might occur, but that a single  $\gamma$ 1 subunit is sufficient to  
450 produce a full effect; and a second, where  $\gamma$ 1:Slo1 assembly always involves a fixed ratio of  $\gamma$ 1 to Slo1  
451 subunits. However, it was also subsequently shown that single channels with an engineered construct  
452 containing only a single  $\gamma$ 1-TM (together with its C-terminal end) segment were sufficient to produce a  
453 full gating shift (ref), but as noted above these constructs lacked an LRRD domain. The present results  
454 empirically suggest that under the conditions of expression in HEK cells the presence of the LRRC  
455 domain strongly constrains assembly to 4:4. Yet this does not preclude the earlier results supporting the  
456 idea that the presence of a single  $\gamma$ 1-TM (together with its C-terminal end) is sufficient to produce the full  
457 gating effects.

458

#### 459 **Plausible mechanism of LRRC26 regulation of Slo1 voltage-gating**

460 The  $\gamma$ 1 subunit, despite producing a larger hyperpolarizing shift in Slo1 GV than the R207A  
461 mutation, does not lead to re-orientation of the S4 gating charges. This suggests that its impact on



462 voltage-sensor activation energetics might be lower than that of R207A. The functional effect of  $\gamma 1$  is thus  
463 more likely to arise from modulation of transitions that occur late in or after Slo1 voltage activation.  
464 Indeed,  $\gamma 1$  subunits have been proposed to profoundly enhance allosteric interactions between the  
465 voltage-sensor and pore<sup>14</sup>.

466 While the LRRD of  $\gamma 1$  plays a distinct and important role in the Slo1:  $\gamma 1$  complex assembly, the  
467  $\gamma 1$ -TM is critical for assembly as well as Slo1 functional regulation<sup>14,67,72,75</sup>. The  $\gamma 1$ -TM kink in particular  
468 might be a critical structural element necessary for its modulatory effects. Mutation of the  $\gamma 1$  residue  
469 S272, localized at the kink, although it does not alter assembly, disrupts its gating shifts. The  $\gamma 1$ -TM kink  
470 is adjacent to the S2 helix of Slo1-VSD, at the level of the hydrophobic gasket (Slo1-F160) which plays  
471 an important role in voltage-sensing. Slo1-D186 (on S3) is also positioned close to the hydrophobic  
472 gasket. These residues (F160 and D186) interact with R210 in the resting state and R213 in the activated  
473 state of the VSD. Mutation of D186 has been reported to affect voltage-sensor activation energetics but  
474 also reduce the allosteric coupling between the voltage-sensor and the PGD<sup>37,38</sup>. Furthermore, the  $\gamma 1$ -TM  
475 also forms a structural contact with and slightly re-orientes the pre-S1 helix. This might participate in  
476 stabilizing the bending of S4-CT, late in voltage-dependent channel opening pathway through interactions  
477 with specific residues such as F223<sup>60</sup>. Drawing on these previous functional results and our structure we  
478 speculate that the  $\gamma 1$ -TM provides structural support to the non-S4 VSD helices and stabilizes them. This  
479 facilitates bending of S4-CT, late during channel activation and in effect favors channel opening (**Fig. 6**).  
480 Overall our hypothesis invokes the idea that the modulatory effects of  $\gamma 1$  are possibly associated with  
481 altering the energy landscape of gating, rather than inducing a specific conformational change in Slo1.  
482 Structural studies on Slo1 in complex with  $\beta 4$  subunits have also led to similar suggestions in the context  
483 of  $\beta 4$  subunit modulation of Slo1 gating<sup>28</sup>. More detailed functional and structural investigations will be  
484 necessary to evaluate our hypothesis. We are hopeful that the approach used here, taking advantage of  
485 mutations that uniquely impact Slo1 voltage-dependent channel opening and gating charge displacement,  
486 may unveil additional conformational intermediates that define the spatial landscape of Slo1 gating and  
487 modulation by auxiliary subunits.

## 488 **Methods**

### 489 **Expression and Purification of hSlo1 mutants**

490 hSlo1<sub>EM</sub> used in previous structural studies was generously provided by Roderick Mackinnon in  
491 the pEG vector for expression in mammalian cells. The construct featured a 57-residue deletion at the  
492 very C-terminus with respect to the native hSlo1 sequence (GI: 507922) and was followed by a 3C  
493 protease cleavage tag, eGFP and rho1D4 antibody recognition sequence. In our study we replaced this  
494 rho1D4 tag with a twin-strep tag and refer to this modified expression construct as hSlo1<sub>EM</sub>. All mutants  
495 were generated in the context of this construct using standard molecular biology techniques (Genscript  
496 Inc.). For protein expression, endotoxin free plasmid DNA (Qiagen) was transfected into suspension  
497 cultures of HEK293F cells, grown in Freestyle 293 media (supplemented with 2% Heat Inactivated FBS)  
498 using Linear PEI (25kDa) at a ratio of 1:3 (plasmid:PEI mass ratio). Post-transfection, cells were grown  
499 for 12-14 hrs at 37°C, and subsequently sodium butyrate was added to the transfected cells to a final  
500 concentration of 10 mM. Cultures were then transferred to 30°C and grown for another 48-54 hrs. Cells  
501 were pelleted, washed with PBS and rapidly frozen in liquid nitrogen and stored at -80°C until use. For  
502 purification, frozen cell pellets were resuspended and sonicated in ice-cold lysis buffer (500 mM KCl, 50  
503 mM Tris, 20% glycerol, 10 mM CaCl<sub>2</sub>, 10 mM MgCl<sub>2</sub> 1% digitonin, pH 8) and gently agitated at 4°C for  
504 1-1.5 hrs. Total protein digitonin extracts were spun at 100,000g for 1 hr and the supernatant was  
505 incubated anti-GFP-nanobody resin (generated by PCF, University of Iowa) for 8-10 hrs. Protein bound  
506 resin was washed 4 times in batch mode, each time with 5 resin volumes of wash buffer (500 mM KCl,  
507 50 mM Tris, 20% glycerol, 0.1% digitonin, pH 8). After the last wash, the resin was resuspended in 2x  
508 resin volume of wash buffer and incubated with Precision protease (ThermoScientific) for 12-14hrs. The  
509 eluted protein was concentrated to ~500 µl using 100kDa centrifugation filters and the resultant protein  
510 was further purified by gel filtration chromatography. The gel filtration buffer used was 300 mM KCl, 25  
511 mM HEPES, 0.05% digitonin, 1 mM EDTA, buffered to pH 8. 1-1.25 ml of the peak fractions of the  
512 protein was collected and concentrated to ~6-7 mg/ml for preparing cryoEM grids. For F315A and  
513 2D2A/4D4A mutants, ~30 g of wet cell pellets (obtained from ~4 L cell culture) resulted in sufficient  
514 amount of sample to prepare 6-8 EM grids. R207A expressed at a much lower level. From ~70 g of wet  
515 cell pellets (obtained from ~8 L cell culture) we finally obtained purified protein at ~5 mg/ml sufficient to  
516 prepare 3-4 EM grids.

517 To test the effect of K<sup>+</sup> ions on protein stability, hSlo1<sub>EM</sub> and its mutants (D292N and Y279F)  
518 were expressed and purified similarly, except that after binding the protein to the resin, the wash buffer  
519 used (to remove contaminants and in which 3C protease cleavage was performed) was 500 mM NaCl, 2.5  
520 mM KCl, 50 mM Tris, 20% glycerol, 0.1% digitonin, pH 8. For the FSEC runs, the running buffer was  
521 300 mM KCl, 20 mM Tris, 0.01% L-MNG, 0.02 mM CHS, buffered to pH 8.

522

### 523 **Expression and Purification of hSlo1: $\gamma$ 1 complex for cryoEM**

524 The  $\gamma$ 1 ORF (human ortholog LRRC26) used in this study was obtained from Genscript database  
525 and tagged on the C-terminus with 3C protease, mCherry and 1x FLAG tags, and finally cloned into pEG  
526 vector. hSlo1<sub>EM</sub> and  $\gamma$ 1 was co-transfected at a total plasmid weight ratio of 1:2. 1 L of HEK293F  
527 suspension culture was transfected with 2.25 mg of total DNA (0.75 mg of hSlo1<sub>EM</sub> and 1.5 mg of  $\gamma$ 1) and  
528 6.75 ml (1 mg/ml stock) of Linear PEI (25 kDa) and expression was carried on as for hSlo1<sub>EM</sub> mutants  
529 described above. For EM sample preparation, 10 L cell culture resulting in ~95g wet cell pellet was used.

530 Whole cell protein extracts (extraction buffer: 500 mM KCl, 50 mM Tris, 20% glycerol, 10 mM  
531 CaCl<sub>2</sub>, 10 mM MgCl<sub>2</sub>, 1% digitonin, pH 8) were centrifuged for 1hr at 100,000g and the supernatant was  
532 incubated with streptactin resin for 12-14hrs (in batch). Protein bound resin was then washed 4 times with  
533 5x resin volumes of Strep-wash buffer (500 mM KCl, 50 mM Tris, 20% glycerol, 0.1% digitonin, 10 mM  
534 CaCl<sub>2</sub>, 10 mM MgCl<sub>2</sub>, pH 8) and protein was eluted in Strep-wash buffer supplemented with 10 mM  
535 desthiobiotin (pH readjusted to 8 after dissolving desthiobiotin). This eluent (E1) was concentrated to  
536 ~10 ml total volume using a 100 kDa MWCO filter and incubated with anti-Flag M2 affinity resin  
537 (Sigma) in batch for 4 hrs. The flow-through from this second affinity purification step (FT2) contained  
538 free hSlo1 tetramers. The resin bound protein was washed 4 times with 5x resin volumes of FLAG-wash  
539 buffer (500 mM KCl, 50 mM Tris, 20% glycerol, 0.1% digitonin, pH 8) and the protein was eluted in  
540 Flag-wash buffer supplemented with 3xFLAG-peptide (0.3 mg/ml). The final eluted protein (E12) was  
541 concentrated to ~400  $\mu$ l. 100  $\mu$ l of commercial 3C Precision protease (ThermoScientific), supplied as ~3  
542 mg/ml (2 U/ $\mu$ l) stock in a storage buffer containing 1 mM DTT, was first volumetrically diluted 20x  
543 using FLAG-wash buffer and concentrated to <100  $\mu$ l using a 30 kDa MWCO filter. This was repeated a  
544 second time until the final concentrate reached ~3 mg/ml and 50  $\mu$ l of this protease (in depleted DTT)  
545 was added to the ~400  $\mu$ l of the purified hSlo1: $\gamma$ 1 (eGFP, mCherry tagged) protein sample. After  
546 overnight incubation at 4°C and the hSlo1: $\gamma$ 1 complex (free of eGFP and mCherry tags) was further  
547 purified using gel filtration chromatography as described in the previous section. The final protein,  
548 concentrated to ~ 6 mg/ml, was used to prepare EM grids.

549

### 550 **Expression and Purification of $\gamma$ subunits and mass-photometry of $\gamma$ 3**

551 The ORFs for LRRC52 ( $\gamma$ 2), LRRC55 ( $\gamma$ 3) and LRRC38 ( $\gamma$ 4) were obtained from Genscript and  
552 used to generate expression constructs as described above for  $\gamma$ 1. The proteins were expressed in  
553 transfected suspension cultures of HEK293F cells as described above. Cells expressing the individual  
554 subtypes of  $\gamma$  subunits were extracted in 500 mM KCl, 50 mM Tris, 20% glycerol, 1% digitonin, pH 8,

555 clarified via ultracentrifugation and subjected to FLAG-affinity purification. After protein binding, the  
556 resin was washed 12 times with 4x resin volume of FLAG-wash buffer: 500 mM KCl, 50 mM Tris, 10%  
557 glycerol, 0.003% L-MNG, 0.02 mM CHS, pH 8. Protein was eluted in FLAG-wash buffer supplemented  
558 with 0.2 mg/ml of 3x FLAG peptide. Purified protein was first assayed using FSEC during which elution  
559 was monitored using mCherry fluorescence (Ex./Em.: 587/610 nm). The expression constructs for the  
560 LRRD domains of  $\gamma$ 1-4 (residues 1-261 for  $\gamma$ 1, 1-244 for  $\gamma$ 2, 1-270 for  $\gamma$ 3 and 1-247 for  $\gamma$ 4) were  
561 generated similar to the full-length  $\gamma$  subunits and were expressed and purified identically.

562 For full-length  $\gamma$ 3, concentrated purified protein (mCherry tagged) was further purified using gel  
563 filtration chromatography using FLAG-wash buffer (without glycerol). Fractions corresponding to the  
564 lower molecular weight peak were pooled, concentrated, and divided into two parts of which one was  
565 incubated with 3C protease for ~12 hrs to release C-terminal tags. The concentrated  $\gamma$ 3 samples (with and  
566 without the tag) were exchanged into detergent-free buffer (300 mM KCl, 20 mM Tris, pH 8) and the  
567 peak fraction was used immediately for mass-photometry experiments (Refeyn Inc). For the latter, protein  
568 was used at a final concentration of 1-3  $\mu$ g/ml.

569

#### 570 **Assembly of hSlo1 with $\gamma$ 1 mutants with Dual-Color FSEC**

571 To test the efficiency of assembly of different auxiliary subunits (and their variants, tagged as  
572 described for  $\gamma$ 1), they were co-expressed with hSlo1<sub>EM</sub> in 60 ml of HEK293F suspension cultures  
573 (plasmid weight: 45  $\mu$ g hSlo1<sub>EM</sub> and 90  $\mu$ g auxiliary subunit and 405  $\mu$ l of PEI (1 mg/ml stock)) and  
574 purified using the 2-step affinity purification described above. However, for quantitative reproducibility  
575 (as opposed to preparative biochemistry) effects of non-specific interaction with affinity chromatography  
576 resins and volumetric changes during protein purification were carefully monitored and controlled.  
577 Particularly, using 2 different variants of a model membrane protein (sea urchin ortholog of SLC9C1, or  
578 sp9C1, tagged C-terminally with eGFP-twin-strep or mCherry-FLAG), which can be purified using  
579 biochemical methods comparable to hSlo1<sub>EM</sub>, we determined that <5% protein was lost due to non-  
580 specific binding of tagged protein with the non-compatible resin (that is, when ~500  $\mu$ l of 1-10  $\mu$ g/ml  
581 sp9C1-eGFP-twinstrep was incubated with ~50  $\mu$ l anti-FLAG resin for 4 hrs at 4°C or when ~500  $\mu$ l of  
582 1-10  $\mu$ g/ml sp9C1-mCherry-FLAG was incubated with ~50  $\mu$ l streptactin resin,  $\geq$ 95% protein was in  
583 the flow-through). For our assembly assay, E11 (the eluent after streptactin affinity chromatography) was  
584 concentrated to 450  $\mu$ l ( $\pm$  2  $\mu$ l, the calibration error of our P200 pipettes). 20  $\mu$ l of E11 was injected for  
585 FSEC analysis where the elution profile was simultaneously monitored by eGFP and mCherry  
586 fluorescence (Ex/Em: 488/507 nm and 587/610 nm respectively). 400  $\mu$ l of E11 was incubated with 50  $\mu$ l  
587 equilibrated anti-FLAG resin in spin columns. Prior to this incubation, we ensured that the resin was

588 almost completely depleted of equilibration buffer by spinning the resin in the spin filtration columns on a  
589 benchtop centrifuge (14000 rpm for 2 mins) leaving the resin almost dry. After 4 hrs of incubation, the  
590 FLAG-resin:EI2 was spun again (at 14000 rpm for 2 mins) and the volume of FT2 was checked and  
591 ensured that it was within 390-405  $\mu$ l. 20  $\mu$ l of FT2 was used for FSEC analysis. The total peak height of  
592 the mCherry-based elution profile for FT2 was always <2% of that for EI1, indicating almost complete  
593 capture of auxiliary subunits by the resin and thus the eGFP-based elution profile represents hSlo1<sub>EM</sub> that  
594 is uncomplexed with the co-expressed auxiliary subunits. The eluent from the second affinity step (EI2)  
595 was also analyzed by FSEC and the eGFP and mCherry fluorescence intensities of the sample peak  
596 should be proportional to the stoichiometry of the purified complexes. However, weak FRET between the  
597 fluorescent tags could potentially obfuscate stoichiometric inferences. Hence, the purified protein was  
598 treated with 3C protease to release the fluorescent tags and the resultant samples were also retested by  
599 FSEC. The eGFP:mcherry intensity ratio (integral of the peaks) of cleaved fluorescent tags,  $\rho_{GC}$ , (which  
600 have a retention volume 4-5 ml lower than when they are attached to the complexes) retain the  
601 stoichiometric information of the purified protein but is FRET-free. To calibrate  $\rho_{GC}$  to a defined  
602 stoichiometry, we used sp9C1 which is an obligate homodimer. sp9C1-eGFP-twinstrep and sp9C1-  
603 mCherry-FLAG was co-expressed in HEK293F cells and purified using the 2-step affinity scheme. The  
604 final purified protein, EI2, necessarily contains 1 copy of eGFP and 1 copy of mCherry and its  $\rho_{GC}$   
605 defined the calibrated  $\rho_{GC}$  for 1:1 complexes. Furthermore, commercially obtained purified free-eGFP and  
606 free-mCherry (Abcam) were mixed at different molar ratios, analysed using FSEC, and used to calibrate  
607  $\rho_{GC}$  for various other stoichiometries. Total expression of all  $\gamma$  variants when co-expressed with hSlo1<sub>EM</sub>,  
608 as quantified by measurement of total mCherry fluorescence in the whole cell detergent extracts, were all  
609 within  $\pm 10\%$  of each other.

610 To quantify fractional assembly we performed Gaussian analysis of the FSEC profiles. The eGFP  
611 profiles of various fractions were fitted to Gaussian curves and the corresponding mCherry profiles were  
612 used to validate and check the accuracy of the Gaussian parameters. For the analysis, the difference  
613 chromatogram (Diff) was generated by subtracting FT2 from EI1. This corresponds to Slo1-auxiliary  
614 subunit complex. Diff, after peak normalization, was overlaid on Peak Normalized EI2 to ensure that the  
615 profiles (peak positions and width) matched well. Unnormalized Diff was fitted to a sum of 2 Gaussians:

616  $A_{1,diff} \exp\left(-\frac{(V-B_{1,diff})^2}{2C_{1,diff}^2}\right) + A_{2,diff} \exp\left(-\frac{(V-B_{2,diff})^2}{2C_{2,diff}^2}\right)$ , where the first component corresponds to the

617 main/desired complex of tetrameric hSlo1 and the auxiliary subunit and the second component  
618 corresponds to other higher molecular weight aggregates (if present they are left shifted with respect to  
619 the first by  $\sim 1.5$  ml on a Superose 6 Increase 10/300 column). FT2 (eGFP profile) was fitted to a sum of 3

620 Gaussians:  $A_{1,FT2} \exp\left(-\frac{(V-B_{1,FT2})^2}{2C_{1,FT2}^2}\right) + A_{2,FT2} \exp\left(-\frac{(V-B_{2,FT2})^2}{2C_{2,FT2}^2}\right) + A_{3,FT2} \exp\left(-\frac{(V-B_{3,FT2})^2}{2C_{3,FT2}^2}\right)$ , where  
621 the first gaussian corresponds to free Slo1 tetramers, the second accounts for some molecular aggregates  
622 of Slo1 (which may be present but is always <10% of total Slo1), and the third corresponds to lower  
623 molecular weight peaks of disassembled Slo1 (which usually is 20-40% of total Slo1). Fractional  
624 assembly (amount of tetrameric hSlo1<sub>EM</sub> in complex with auxiliary subunit relative to total tetrameric  
625 Slo1<sub>EM</sub>) was quantified as:  $(A_{1,diff} * C_{1,diff}) / ((A_{1,FT2} * C_{1,FT2}) + (A_{1,diff} * C_{1,diff}))$

626

### 627 **CryoEM grid preparation and imaging**

628 The purified and concentrated proteins were incubated with an additional 5 mM EDTA for 2-4  
629 hrs before preparation of EM grids. 3.5  $\mu$ l of concentrated purified protein was applied to glow-  
630 discharged copper holey carbon grids (Quantifoil R 1.2/1.3, 300 mesh). In all cases, grids were blotted at  
631 4°C for 5 s at 100% humidity with a blot force of 0 and then plunge frozen in liquid ethane using a  
632 Vitrobot Mark IV (ThermoFisher Scientific). All data were collected on a Titan Krios (operating at an  
633 accelerating voltage of 300kV), equipped with a K3 Detector (Gatan). Images were recorded with EPU  
634 software (ThermoFisher Scientific) in super-resolution mode with a pixel size of 0.54 Å, and a nominal  
635 defocus of -0.9 to -1.7  $\mu$ m. For all datasets, a total dose of 72 electrons/Å<sup>2</sup> fractionated over 40 frames was  
636 used.

637

### 638 **Image Processing and Map Calculation**

639 Image processing and map calculations were performed using CryoSPARC<sup>92</sup> and Relion<sup>93</sup>.  
640 Motion corrected (via Patch motion correction) were subjected to contrast transfer function (CTF)  
641 estimation (Patch CTF). Micrographs with CTF resolution > 6Å or total pixel drift > 60 pixels were  
642 discarded. Blob picker was used to pick particles from 500-1000 images, which were subject to several  
643 rounds of reference-free 2D class averaging. The final set of 2D projections (3-10) were used for  
644 template-based particle picking from curated movies. Particles corresponding to these classes (20-50K)  
645 particles were used to obtain a representative initial 3D map of the protein via Ab initio reconstruction (1  
646 class). The template picked particles were subject to several rounds of heterogenous refinements using the  
647 initial 3D map as reference. At each step of heterogenous refinement, the particles which were classified  
648 to low resolution classes were discarded. The set of particles finally retained were refined using Non-  
649 uniform, CTF (local and global) and local (with mask around the full protein) refinement routines on  
650 CryoSPARC (with C4 symmetry imposed) to obtain the final maps (for F315A and 4D4A/2D2A  
651 datasets). In the R207A dataset, the particles were exported to Relion and further classified using 3D  
652 classification, without alignment. The optimal set of particles were imported back into CryoSPARC and



653 subject to Non-uniform and CTF refinements to obtain the final map. For the hSlo1:γ1 complex data  
654 processing initially resulted in a map where all relevant densities were clearly observed but the  
655 extracellular LRRD density for γ1 was relatively lower in quality (hSlo1-γ1-Full map). In separate  
656 workflows, these particle stacks were subject to particle subtraction (on Cryosparc) to remove density for  
657 the LRRD and for the gating-ring and subsequent refinements (using masks around the non-LRRD or the  
658 non-gating-ring parts of the complex respectively) with C4 symmetry imposed were used to obtain the  
659 hSlo1-γ1-LRRD-masked and hSlo1-γ1-GR-masked maps. For the F315A dataset, particle stacks were  
660 binned by a factor of 1.667 while for the others they were binned by a factor of 2.

661

### 662 **Model Building and Refinement**

663 The DVF model of hSlo1<sub>EM</sub> (6V3G) was used to build atomic models for the hSlo1<sub>EM</sub> mutants  
664 into our density maps. For γ1, an alphafold predicted model was used to guide model building. For  
665 F315A, the sharpened map was used for model building but the rest of the structural models were built  
666 into the unsharpened maps. Models were built via iterative rounds of manual model building on COOT  
667 and real space refinement in Phenix. The final refined atomic models were validated using MolProbity<sup>94</sup>.  
668 All structural analyses were performed on UCSF Chimera. Structural figures were generated using UCSF  
669 ChimeraX or Pymol.

670

### 671 **Electrophysiology and Data Analysis**

672 As described before<sup>95</sup>, Slo1 channels were expressed in stage IV *Xenopus* oocyte by cRNA  
673 injection of mouse Slo1 (mSlo1) or human Slo1 (hSlo1) without or with human LRRC26 (hγ1).  
674 Macroscopic and single channel currents were recorded in the inside-out patch configuration with an  
675 Axopatch 200B amplifier (Molecular Devices, Sunnyvale, CA). Data were acquired with the Clampex  
676 program from the pClamp software package (Molecular Devices, San Jose, CA). The pipette resistance  
677 for ionic current recording was typically 1-2 MΩ (macroscopic) or 4-5 MΩ (single) after heat polishing.  
678 The pipette solution which bathes the extracellular face of patch membranes) contained (in mM): 140 K-  
679 methanesulfonate (KMES), 20 KOH, 2 MgCl<sub>2</sub>, 10 HEPES. Solutions applied to the cytosolic side of the  
680 membrane contained (in mM): 140 KMES, 20 KOH, 10 HEPES. 5 mM HEDTA was used for 10 μM  
681 Ca<sup>2+</sup> and 5 mM EGTA for 0 μM Ca<sup>2+</sup> cytosolic solutions. The pH of all solutions was adjusted to 7 with  
682 methanesulfonic acid. An SF-77B fast perfusion stepper system (Warner Instruments, Hamden, CT) was  
683 used to produce solution exchange at the tip of the recording pipette. Experiments were performed at  
684 room temperature (~22-25 °C). All chemicals were purchased from Sigma-Aldrich (St. Louis, MO).



685 Tail current amplitude measured 150  $\mu$ s after repolarization to -120 mV was used to define  
686 the G-V relationship of Slo1 channels. G-V curves were fit by the Boltzmann function:  $G = G_{max}/(1 +$   
687  $\exp(-z(V - V_h)/kT))$ .  $G_{max}$  is maximal conductance,  $z$  is apparent voltage-dependence in units of  
688 elementary charge,  $V_h$  is the voltage of half-maximal activation, and  $k$  and  $T$  have their usual physical  
689 meanings. The open probability of Slo1 single channel current was determined by the threshold-based  
690 Event Detection method in Clampfit 9.2 (Molecular Device). Data were analyzed using OriginPro 7.5  
691 (OriginLab Corporation) or Clampfit 9.2. Error bars in the figures represent SDs.

692

### 693 **DATA AVAILABILITY**

694 All experimental data will be made available upon reasonable request. Sharpened, unsharpened  
695 and half-maps for 6 reconstructions and 5 atomic models (described in Supplementary Tables 1 and 2)  
696 have been deposited to EMDB/PDB repositories.

697

### 698 **ACKNOWLEDGEMENTS**

699 This research was supported by grants to S.C. from NIH (R01-GM145719) and Department of  
700 Molecular Physiology and Biophysics, University of Iowa and NIH grant (R35-GM118114) to C.L.. We  
701 thank Dr. Vera Moiseenkova-Bell and acknowledge the use of instruments at the Beckman Center for  
702 Cryo-Electron Microscopy at the University of Pennsylvania Perelman School of Medicine. We thank Dr.  
703 Stefan Steimle for assistance with Krios microscope operation at the Beckman Center for Cryo-Electron  
704 Microscopy at the University of Pennsylvania, Perelman School of Medicine. We thank Dr. Vivian  
705 Gonzalez-Perez (Washington University at St. Louis) and Dr. Alexandria N. Miller (University of Iowa)  
706 for helpful discussions, Dr. Zhen Xu (PCF, University of Iowa) for providing anti-GFP conjugated resin  
707 and Sankar Baruah (PCF, University of Iowa) for help with gel filtration chromatography and mass-  
708 photometry

709

### 710 **AUTHOR CONTRIBUTIONS**

711 S.C. designed and directed research. G.S.K performed biochemistry experiments. K.P. built  
712 atomic models. S.C. assisted with biochemistry experiments, analyzed biochemical data and performed  
713 single-particle analysis. Y.Z. performed electrophysiology experiments. Y.Z. and C.L. analyzed  
714 electrophysiology data. S.C. wrote initial draft of manuscript and modified it together with C.L. All  
715 authors contributed towards preparing manuscript figures.

716

### 717 **COMPETING INTERESTS**

718 The authors declare no competing financial interests.

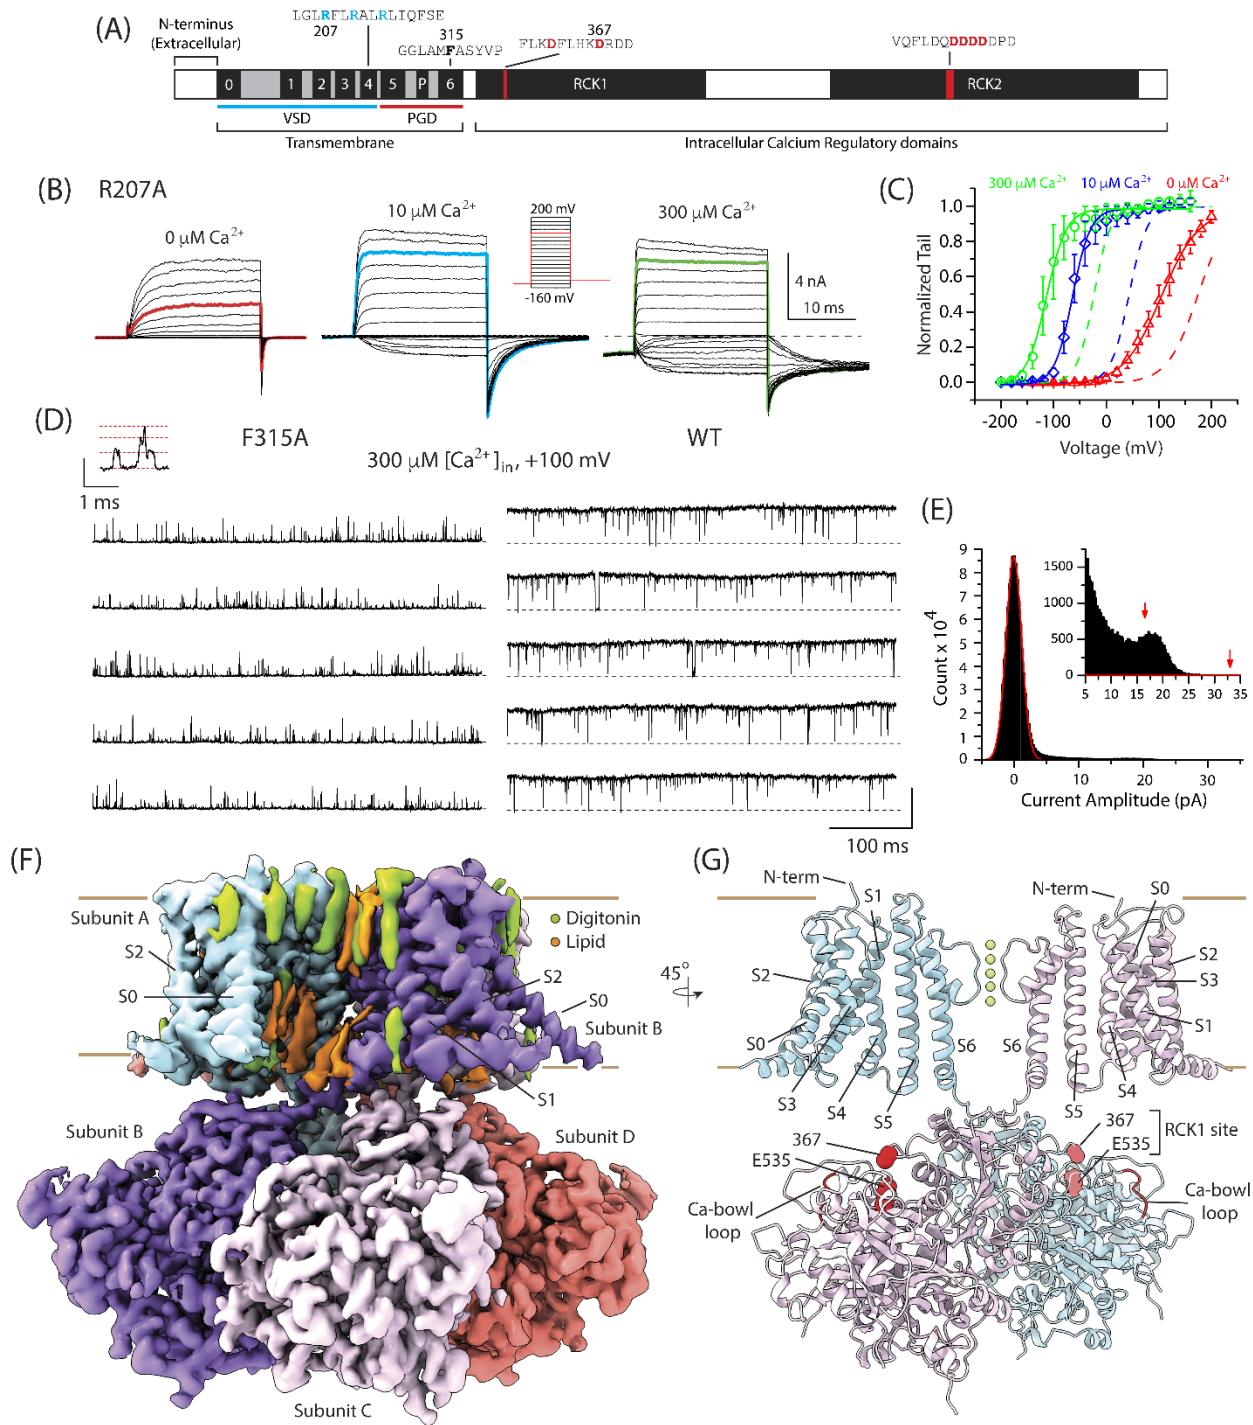

719

Figure 1. Kallure et al

720 **Figure 1. High resolution reconstruction of Slo1 channel mutants in EDTA.** (A) Topological map of  
 721 the Slo1 channel showing the organization of the transmembrane domain (with the voltage-sensing

722 domain, VSD, comprising transmembrane helices S0-S4, and the pore gating domain, PGD, formed by  
723 transmembrane helices S5, S6 and the intervening P helix) and the large intracellular calcium regulatory  
724 domain (comprising the two RCK domains). The specific sites of the mutations explored in this study,  
725 and their adjoining sequence motifs, are highlighted. **(B)** Macroscopic currents of R207A evoked by a  
726 voltage protocol shown in inset in the presence of 0 (*left*), 10 (*middle*) and 300 (*right*)  $\mu\text{M}$  intracellular  
727  $\text{Ca}^{2+}$ . The dotted line marks the baseline (0) current level in these sample traces. **(C)** The G-V relationship  
728 of R207A determined from tail currents. Solid lines are Boltzmann fits to each GV: 104 mV,  $0.70e$  (0  
729 mM  $\text{Ca}^{2+}$ ), -64 mV,  $1.49e$  (10  $\mu\text{M}$   $\text{Ca}^{2+}$ ), -114 mV,  $1.33e$  (300  $\mu\text{M}$   $\text{Ca}^{2+}$ ). The dotted lines are the  
730 Boltzmann fit of WT BK channels: 174 mV,  $0.88e$  (0  $\mu\text{M}$   $\text{Ca}^{2+}$ ), 43 mV,  $1.47e$  (10  $\mu\text{M}$   $\text{Ca}^{2+}$ ), -23 mV,  
731  $1.60e$  (300  $\mu\text{M}$   $\text{Ca}^{2+}$ ). Error bars present standard deviations ( $n = 5$ ) **(D)** Single channel activity of F315A  
732 (*left*) and WT Slo1 (*right*) recorded at +100 mV in 300  $\mu\text{M}$   $[\text{Ca}^{2+}]_{\text{in}}$ . Openings are upward with baseline  
733 marked by dotted lines. There were at least three channels in the representative recordings for F315A  
734 (*left*), as shown by three opening levels observed at +120 mV in the same patch (*inset*). The  $P_{\text{O}}$  of WT  
735 Slo1 in the representative recording (*right*) was 0.98 under identical conditions. Current scale represents  
736 30 pA (main recordings and inset). **(E)** An all-point amplitude histogram generated from F315A single  
737 channel activity with a single Gaussian fit (solid red line) to the baseline. Most points not contributing to  
738 baseline, highlighted in the inset, represent unresolved openings and transitions and therefore do not result  
739 in well-defined amplitude components. Arrows highlight putative single channel levels assessed from a  
740 few longer dwells at open levels, suggesting that single channel conductance of F315A is markedly  
741 reduced compared to WT.  $P_{\text{O}}$  of this F315A channel was no more than 0.016 under the recording  
742 conditions. **(F)** Final unsharpened density map for the 2D2A/4D4A Slo1. The density for the four  
743 different subunits are colored uniquely. Non-protein densities corresponding to detergent (digitonin) and  
744 lipid (modeled as POPC) are highlighted in green and orange respectively. **(G)** Final model for  
745 2D2A/4D4A derived from the map in (F) showing two diagonally apposed subunits (of the tetramer). All  
746 transmembrane domains and the two calcium binding loci in each subunit are marked. In this mutant,  
747 several of the aspartates in the acidic loop and D367 (together with D362) and mutated to Ala.

748  
749  
750  
751  
752  
753  
754  
755  
756  
757  
758  
759  
760  
761  
762  
763  
764  
765  
766  
767  
768

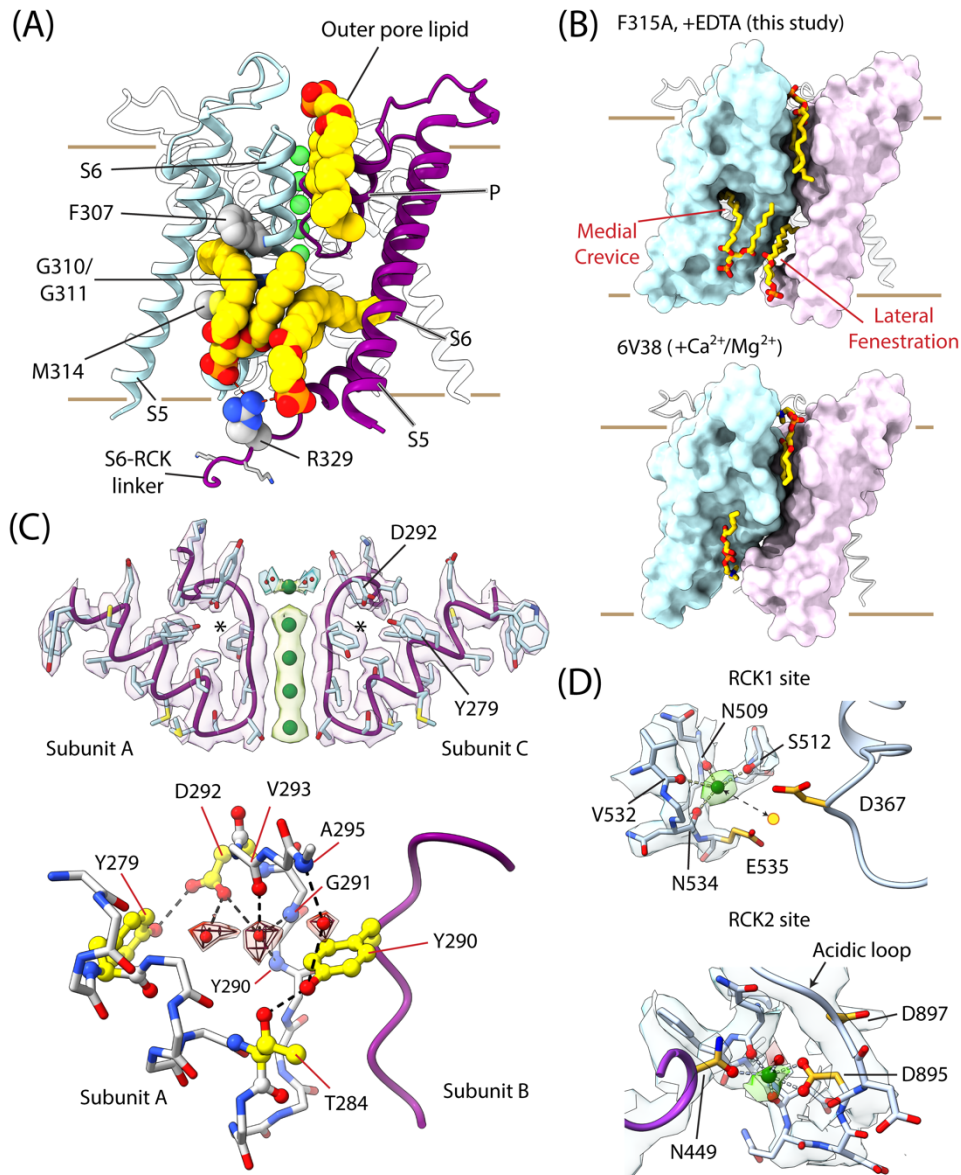

Figure 2. Kallure, et al

769 **Figure 2. Lipid, water and ion interactions with Slo1 in presence of EDTA.** All representations are  
770 derived from the model for the F315A mutant of Slo1. (A) The PGD showing the S5, S6 and P helices.  
771 Two adjacent subunits are colored in light blue and purple. The three key lipid molecules are shown in  
772 spheres (yellow: lipid tail; orange-red: phosphate head group). Sidechains of specific residues (F307,  
773 M314, R329) in intimate contact with the lipids are shown in spheres. Green spheres represent the K<sup>+</sup> ions  
774 in the selectivity filter. (B) Surface representation of the PGD highlighting two adjacent subunits (in light

775 blue and light purple) and the inter- and intra-subunit crevices that are lipid occupied in the F315A  
776 (+EDTA) model (*top*). The medial crevice and lateral fenestrations contract in the DVB state model  
777 (6V38)<sup>28</sup> (*bottom*). **(C)** *Top*, Map and model of selectivity filter of two of the diagonally oriented subunits  
778 of Slo1 showing the K<sup>+</sup> ion densities in the selectivity filter. 3 specific residues (D292, Y279 and Y290,  
779 marked with an \*) are highlighted. *Bottom*, The selectivity filter of two adjacent subunits (one represented  
780 as sticks and the other purple ribbon), showing densities for three water molecules (superimposed mesh  
781 and surface: transparent red) and various protein (sidechain and backbone) interactions stabilizing them.  
782 All dashed lines represent distances < 3.2 Å. **(D)** Close-up views of the map and model around the RCK1  
783 (*top*) and RCK2 (*bottom*) sites. *Top*, a tetrahedrally coordinated ion density (green, modeled as a K<sup>+</sup> ion),  
784 is about 5.5 Å away from the mass center (yellow circle) of the sidechains of residues E535 and D367  
785 (the high affinity Ca<sup>2+</sup> coordinating sidechains in the RCK1 domain); *Bottom*, a density (in green),  
786 resembling a water-linked-ion, bridges the sidechains of N449 of one subunit and D897 of the adjacent  
787 subunit together with other backbone carbonyls in the acidic loop. All ion coordinations shown are < 3.2  
788 Å.



789  
790  
791  
792  
793  
794  
795  
796  
797

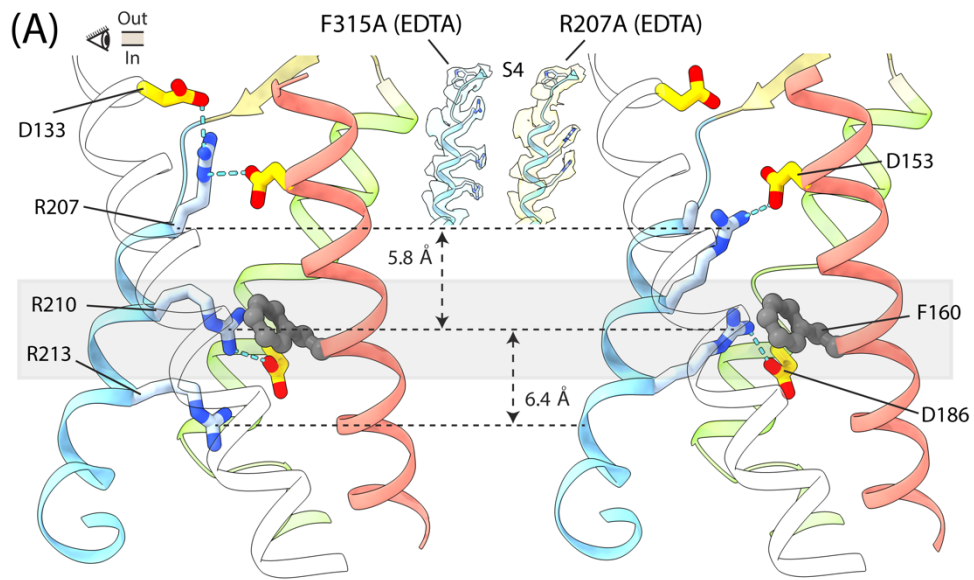

798  
799  
800  
801  
802  
803  
804  
805  
806  
807  
808

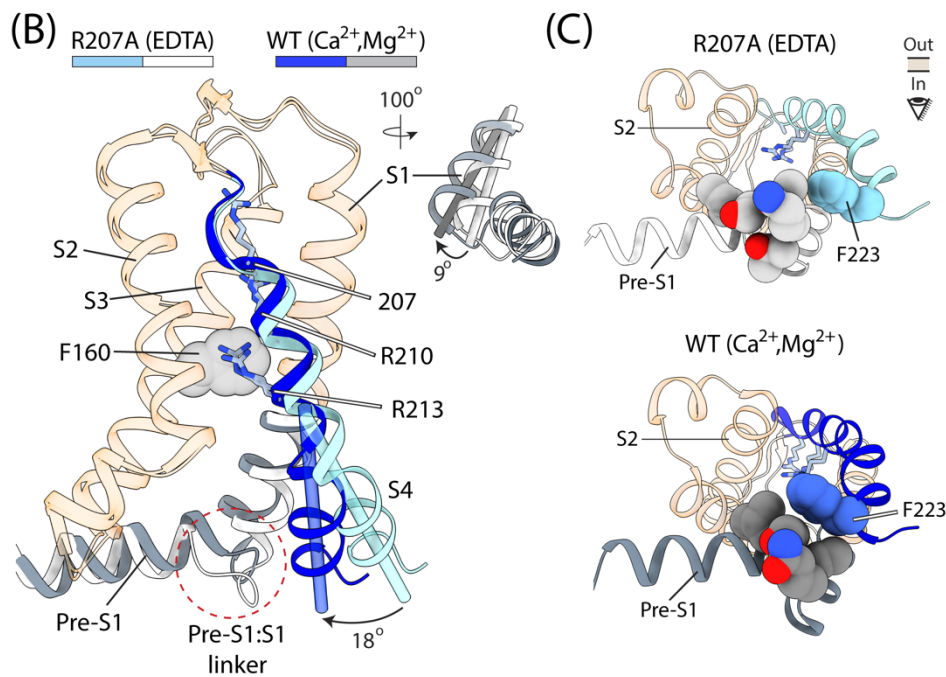

809  
810

Figure 3. Kallure, et al

811 **Figure 3. Re-arrangements in the VSD of Slo1.** (A) VSDs of F315A (left) and R207A (right) in  
812 presence of EDTA (S1: transparent white, S2: red, S3: green and S4: blue; S0 is not shown) showing  
813 sidechains of R210, R213 and R207 (left) or A207 (right). The focused electric field is speculatively  
814 marked by the transparent gray slab. Blue dotted lines indicate contacts  $< 3.5 \text{ \AA}$ . Between the two states,  
815 D186 and R210 change their salt-bridge partners. Insets show the density of S4 charges in the resting

816 (F315A) and activated (R207A) states. **(B)** Superposition of the VSDs of the R207A model and the DVB  
817 state model (6V38)<sup>28</sup> (ref). S4 helix is in light blue/dark blue for R207A/DVB state models. The pre-S1  
818 and intracellular end of S1 are in white/gray for R207A/DVB. The inner end of S4 and S1 rotate by 18°  
819 and 9° respectively. Other VSD helices align well between the two models (transparent red helices). **(C)**  
820 Bottom-up views of the VSD of R207A (*top*) and DVB state (*bottom*). F223 becomes more effectively  
821 packed against residues connecting the pre-S1 helix to the inner end of S1.



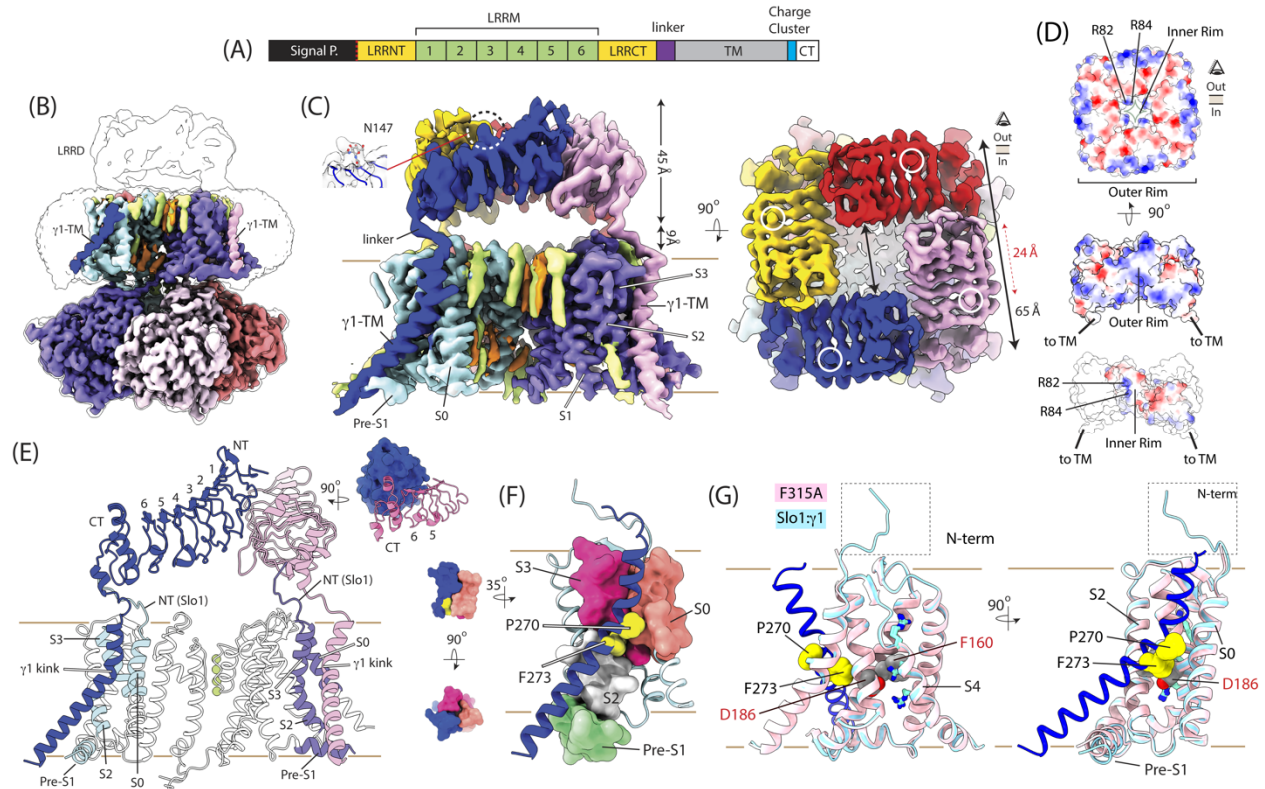

Figure 4. Kallure et al.

822

823 **Figure 4. Structure of Slo1:γ1 complex in EDTA.** (A) *Top*, Topological map of the γ1 subunit showing  
 824 the key structural motifs. The N-terminal signal peptide is cleaved post-translationally. (B) LRRD-  
 825 masked unsharpened density map (colored), contoured at a high threshold, is superposed on the unmasked  
 826 unsharpened density map, contoured at a low threshold (transparent white). The densities for γ1-TM of 2  
 827 subunits are indicated in the LRRD-masked map. (C) *Left*, Side view of the Gating-Ring masked (GR-  
 828 masked) unsharpened map for the Slo1:γ1 complex where different subunits are colored uniquely.  
 829 Detergent and lipid densities are in green and orange, respectively. The inset shows glycosylation density  
 830 on residue N147. *Right*, Top view of the GR-masked unsharpened map showing the LRRD density and  
 831 highlighting the glycosylation density corresponding to N147. (D) Surface electrostatic potential maps of  
 832 the tetrameric LRRD ring in a top-down view (*top*) and side view (*middle*) (Blue: 10kT/e, White: 0 and  
 833 Red: -10kT/e). *Bottom*, electrostatic potential of the inner rim of a single LRRD (only 3 LRRDs are  
 834 shown, with 2 LRRDs in white and only 1 colored). (E) Model of the transmembrane domains of two  
 835 adjacent subunits of Slo1 and their γ1 partners. The various motifs of the LRRD and the kink in the γ1-  
 836 TM are marked. Specific segments of the VSD which pack against the γ1-TM are colored (in green in one  
 837 subunit and purple in the other). The inset shows the interface between the LRRDs of two adjacent γ1

838 subunits. **(F)** Parts of the S0, S2, S3 and pre-S1 helix are shown in surface representation, together with  
839 the  $\gamma$ 1-TM. The latter (in particular two residues, P270 and F273 shown in spheres) fits into surface  
840 grooves formed by specific regions of the Slo1 VSD. **(G)** Superposition of the VSD of the F315A model  
841 (resting state), in pink, with that of the Slo1: $\gamma$ 1 complex (GR-masked), in light blue. The  $\gamma$ 1-TM is in dark  
842 blue. Key residues of the VSD (S4 charges, F160 and D186) are perfectly aligned between the two  
843 models. F160 and D186 (labeled in red) point within the VSD core and the kink of  $\gamma$ 1-TM (particularly  
844 F273) is featured right next to them.



857 and from mixtures of free eGFP/mCherry (for 4:5, 4:4, 4:3 and 4:2 stoichiometries). **(C)** *Top*, Size  
858 exclusion chromatography profile of affinity purified full-length  $\gamma 3$ -mCherry (monitored with mCherry  
859 Fluorescence) in 0.01% L-MNG buffer (red). Fractions corresponding to the smaller molecular weight  
860 peak were pooled and exchanged into detergent free buffer by size exclusion chromatography (before and  
861 after removal of the mCherry tag) where the elution was monitored via A280 absorbance (black and gray  
862 traces). *Middle, Bottom*, Mass photometry profiles of the lower molecular species in affinity purified  $\gamma 3$ -  
863 mCherry, before (*middle*) and after (*bottom*) release of the mCherry tags. **(D)** A composite model of the  
864 Slo1: $\gamma 1$ : $\beta 4$  complex generated by Slo1 guided alignment of our structural model of the Slo1: $\gamma 1$  complex  
865 (GR-masked) and the structural model of the Slo1: $\beta 4$  complex. One  $\beta 4$  subunit is shown in opaque green  
866 (other  $\beta 4$  subunits are in transparent green). One  $\gamma 1$ -TM is shown in opaque dark blue (others are in  
867 transparent pink, red and yellow). One Slo1 subunit is opaque with the VSD helices in light blue and the  
868 PGD in gray. The LRRDs of the 4  $\gamma 1$  subunits and the extracellular loop of the  $\beta 4$  are shown as surface  
869 representation (LRRD of 1  $\gamma 1$  subunit also shown in cartoon). The clash between the extracellular  
870 domains (ECDs) of the  $\beta$  and  $\gamma$  subunits in this hypothetical dodecameric ternary complex is indicated.  
871 **(E)** Top down views of the ECDs of  $\beta 4$  (*top*) and  $\gamma 1$  (*bottom*) of the hypothetical dodecameric ternary  
872 complex. Transmembrane helices of 1 subunit each of Slo1,  $\beta 4$  and  $\gamma 1$  are shown. **(F)** Effect of co-  
873 expression of  $\beta 4$  and  $\beta 2$  subunits on fractional assembly of Slo1 with  $\gamma 1$  (*top*) and  $\rho_{GC}$  of doubly purified  
874 Slo1: $\gamma 1$  complex at different levels of  $\beta$  subunit transfection. **(G)** A non-binomial, cooperative model of  
875 assembly of Slo1 tetramer with  $\gamma 1$  where interaction between LRRDs makes high stoichiometry  
876 complexes more favorable (*lower path*) as opposed to a binomial, independent model of assembly (*upper*  
877 *path*) where the assembly of  $\gamma 1$  with Slo1 tetramer does not depend on the number of  $\gamma 1$  subunits pre-  
878 associated with the Slo1. Increasingly darker arrows in the steps of association (in the cooperative  
879 assembly model) indicate an increase in avidity.

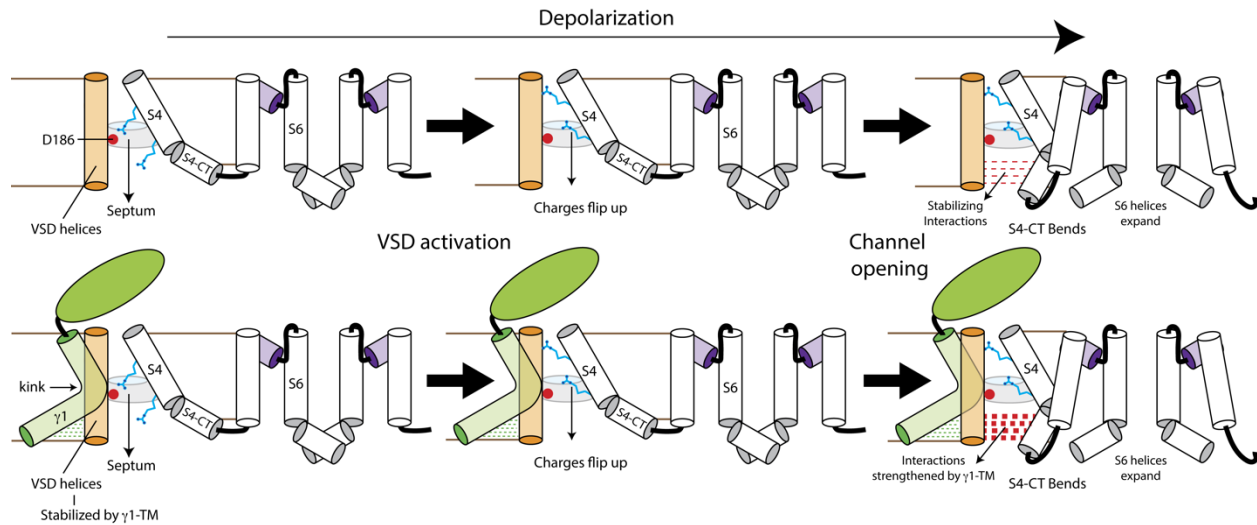

Figure 6. Kallure et al.

880

881 **Figure 6. Possible mechanism underlying modulation of voltage-dependent gating by  $\gamma 1$  subunits.**

882 *Top*, In the absence of  $\gamma 1$ , voltage-dependent channel opening involves a rotameric flip of the gating

883 charges on the S4 segment which transfers the positively charged guanidinium moieties of Arg residues

884 across a focused electric field (the hydrophobic septum). Subsequently, when the S6 helices expand, as

885 channels open, the intracellular, C-terminal end of S4 (S4-CT) rotates inward and interacts with the non-

886 S4 helices of the VSD. These interactions (red dotted lines) might facilitate electromechanical coupling.

887 *Bottom*, the association of  $\gamma 1$  subunits with Slo1 structurally stabilizes the non-S4 helices of the VSD.

888 This strengthens the interactions between the S4-CT and non-S4 VSD helices which overall facilitates

889 channel opening by enhancing electromechanical coupling between the VSD and the pore.



890           **REFERENCES**

- 891
- 892   1     Atkinson, N. S., Robertson, G. A. & Ganetzky, B. A component of calcium-activated  
893     potassium channels encoded by the *Drosophila slo* locus. *Science* **253**, 551-555 (1991).  
894     <https://doi.org/10.1126/science.1857984>
- 895   2     Butler, A., Tsunoda, S., McCobb, D. P., Wei, A. & Salkoff, L. mSlo, a complex mouse  
896     gene encoding "maxi" calcium-activated potassium channels. *Science* **261**, 221-224  
897     (1993). <https://doi.org/10.1126/science.7687074>
- 898   3     Elkins, T., Ganetzky, B. & Wu, C. F. A *Drosophila* mutation that eliminates a calcium-  
899     dependent potassium current. *Proc Natl Acad Sci U S A* **83**, 8415-8419 (1986).  
900     <https://doi.org/10.1073/pnas.83.21.8415>
- 901   4     Marty, A. Ca-dependent K channels with large unitary conductance in chromaffin cell  
902     membranes. *Nature* **291**, 497-500 (1981). <https://doi.org/10.1038/291497a0>
- 903   5     Pallotta, B. S., Magleby, K. L. & Barrett, J. N. Single channel recordings of Ca<sup>2+</sup>-  
904     activated K<sup>+</sup> currents in rat muscle cell culture. *Nature* **293**, 471-474 (1981).  
905     <https://doi.org/10.1038/293471a0>
- 906   6     Contreras, G. F. *et al.* A BK (Slo1) channel journey from molecule to physiology.  
907     *Channels (Austin)* **7**, 442-458 (2013). <https://doi.org/10.4161/chan.26242>
- 908   7     Latorre, R. *et al.* Molecular Determinants of BK Channel Functional Diversity and  
909     Functioning. *Physiol Rev* **97**, 39-87 (2017). <https://doi.org/10.1152/physrev.00001.2016>
- 910   8     Li, Q. & Yan, J. Modulation of BK Channel Function by Auxiliary Beta and Gamma  
911     Subunits. *Int Rev Neurobiol* **128**, 51-90 (2016).  
912     <https://doi.org/10.1016/bs.irn.2016.03.015>
- 913   9     Gonzalez-Perez, V. & Lingle, C. J. Regulation of BK Channels by Beta and Gamma  
914     Subunits. *Annu Rev Physiol* **81**, 113-137 (2019). <https://doi.org/10.1146/annurev-physiol-022516-034038>
- 915   10    Wallner, M., Meera, P. & Toro, L. Molecular basis of fast inactivation in voltage and  
916     Ca<sup>2+</sup>-activated K<sup>+</sup> channels: a transmembrane beta-subunit homolog. *Proc Natl Acad Sci*  
917     *U S A* **96**, 4137-4142 (1999). <https://doi.org/10.1073/pnas.96.7.4137>
- 918   11    Xia, X. M., Ding, J. P. & Lingle, C. J. Molecular basis for the inactivation of Ca<sup>2+</sup>- and  
919     voltage-dependent BK channels in adrenal chromaffin cells and rat insulinoma tumor  
920     cells. *J Neurosci* **19**, 5255-5264 (1999). <https://doi.org/10.1523/JNEUROSCI.19-13-05255.1999>
- 921   12    Xia, X. M., Ding, J. P. & Lingle, C. J. Inactivation of BK channels by the NH<sub>2</sub> terminus  
922     of the beta2 auxiliary subunit: an essential role of a terminal peptide segment of three  
923     hydrophobic residues. *J Gen Physiol* **121**, 125-148 (2003).  
924     <https://doi.org/10.1085/jgp.20028667>
- 925   13    Torres, Y. P., Granados, S. T. & Latorre, R. Pharmacological consequences of the  
926     coexpression of BK channel alpha and auxiliary beta subunits. *Front Physiol* **5**, 383  
927     (2014). <https://doi.org/10.3389/fphys.2014.00383>
- 928   14    Yan, J. & Aldrich, R. W. LRRC26 auxiliary protein allows BK channel activation at  
929     resting voltage without calcium. *Nature* **466**, 513-516 (2010).  
930     <https://doi.org/10.1038/nature09162>
- 931   15    Manzanares, D. *et al.* IFN-gamma-mediated reduction of large-conductance, Ca<sup>2+</sup>-  
932     activated, voltage-dependent K<sup>+</sup> (BK) channel activity in airway epithelial cells leads to  
933
- 934

- 935 mucociliary dysfunction. *Am J Physiol Lung Cell Mol Physiol* **306**, L453-462 (2014).  
936 <https://doi.org/10.1152/ajplung.00247.2013>
- 937 16 Manzanares, D. *et al.* Airway Surface Dehydration by Transforming Growth Factor beta  
938 (TGF-beta) in Cystic Fibrosis Is Due to Decreased Function of a Voltage-dependent  
939 Potassium Channel and Can Be Rescued by the Drug Pirfenidone. *J Biol Chem* **290**,  
940 25710-25716 (2015). <https://doi.org/10.1074/jbc.M115.670885>
- 941 17 Romanenko, V. G., Thompson, J. & Begenisich, T. Ca<sup>2+</sup>-activated K channels in parotid  
942 acinar cells: The functional basis for the hyperpolarized activation of BK channels.  
943 *Channels (Austin)* **4**, 278-288 (2010). <https://doi.org/10.4161/chan.4.4.12197>
- 944 18 Lingle, C. J. *et al.* LRRC52 regulates BK channel function and localization in mouse  
945 cochlear inner hair cells. *Proc Natl Acad Sci U S A* **116**, 18397-18403 (2019).  
946 <https://doi.org/10.1073/pnas.1907065116>
- 947 19 Zeng, X. H., Yang, C., Xia, X. M., Liu, M. & Lingle, C. J. SLO3 auxiliary subunit  
948 LRRC52 controls gating of sperm KSPER currents and is critical for normal fertility.  
949 *Proc Natl Acad Sci U S A* **112**, 2599-2604 (2015).  
950 <https://doi.org/10.1073/pnas.1423869112>
- 951 20 Yan, J. & Aldrich, R. W. BK potassium channel modulation by leucine-rich repeat-  
952 containing proteins. *Proc Natl Acad Sci U S A* **109**, 7917-7922 (2012).  
953 <https://doi.org/10.1073/pnas.1205435109>
- 954 21 Horrigan, F. T. & Aldrich, R. W. Allosteric voltage gating of potassium channels II. Mslo  
955 channel gating charge movement in the absence of Ca(2+). *J Gen Physiol* **114**, 305-336  
956 (1999). <https://doi.org/10.1085/jgp.114.2.305>
- 957 22 Horrigan, F. T., Cui, J. & Aldrich, R. W. Allosteric voltage gating of potassium channels  
958 I. Mslo ionic currents in the absence of Ca(2+). *J Gen Physiol* **114**, 277-304 (1999).  
959 <https://doi.org/10.1085/jgp.114.2.277>
- 960 23 Horrigan, F. T. & Aldrich, R. W. Coupling between voltage sensor activation, Ca<sup>2+</sup>  
961 binding and channel opening in large conductance (BK) potassium channels. *J Gen*  
962 *Physiol* **120**, 267-305 (2002). <https://doi.org/10.1085/jgp.20028605>
- 963 24 Contreras, G. F., Neely, A., Alvarez, O., Gonzalez, C. & Latorre, R. Modulation of BK  
964 channel voltage gating by different auxiliary beta subunits. *Proc Natl Acad Sci U S A*  
965 **109**, 18991-18996 (2012). <https://doi.org/10.1073/pnas.1216953109>
- 966 25 Hite, R. K., Tao, X. & MacKinnon, R. Structural basis for gating the high-conductance  
967 Ca(2+)-activated K(+) channel. *Nature* **541**, 52-57 (2017).  
968 <https://doi.org/10.1038/nature20775>
- 969 26 Raisch, T. *et al.* Small molecule modulation of the Drosophila Slo channel elucidated by  
970 cryo-EM. *Nat Commun* **12**, 7164 (2021). <https://doi.org/10.1038/s41467-021-27435-w>
- 971 27 Tao, X., Hite, R. K. & MacKinnon, R. Cryo-EM structure of the open high-conductance  
972 Ca(2+)-activated K(+) channel. *Nature* **541**, 46-51 (2017).  
973 <https://doi.org/10.1038/nature20608>
- 974 28 Tao, X. & MacKinnon, R. Molecular structures of the human Slo1 K(+) channel in  
975 complex with beta4. *Elife* **8** (2019). <https://doi.org/10.7554/eLife.51409>
- 976 29 Xia, X. M., Zeng, X. & Lingle, C. J. Multiple regulatory sites in large-conductance  
977 calcium-activated potassium channels. *Nature* **418**, 880-884 (2002).  
978 <https://doi.org/10.1038/nature00956>



- 979 30 Zhou, Y., Yang, H., Cui, J. & Lingle, C. J. Threading the biophysics of mammalian Slo1  
980 channels onto structures of an invertebrate Slo1 channel. *J Gen Physiol* **149**, 985-1007  
981 (2017). <https://doi.org/10.1085/jgp.201711845>
- 982 31 Horrigan, F. T. Perspectives on: conformational coupling in ion channels: conformational  
983 coupling in BK potassium channels. *J Gen Physiol* **140**, 625-634 (2012).  
984 <https://doi.org/10.1085/jgp.201210849>
- 985 32 Lorenzo-Ceballos, Y., Carrasquel-Ursulaez, W., Castillo, K., Alvarez, O. & Latorre, R.  
986 Calcium-driven regulation of voltage-sensing domains in BK channels. *Elife* **8** (2019).  
987 <https://doi.org/10.7554/eLife.44934>
- 988 33 Chen, G., Li, Q., Webb, T. I., Hollywood, M. A. & Yan, J. BK channel modulation by  
989 positively charged peptides and auxiliary gamma subunits mediated by the Ca<sup>2+</sup>-bowll  
990 site. *J Gen Physiol* **155** (2023). <https://doi.org/10.1085/jgp.202213237>
- 991 34 Cox, D. H. & Aldrich, R. W. Role of the beta1 subunit in large-conductance Ca(2+)-  
992 activated K(+) channel gating energetics. Mechanisms of enhanced Ca(2+) sensitivity. *J*  
993 *Gen Physiol* **116**, 411-432 (2000). <https://doi.org/10.1085/jgp.116.3.411>
- 994 35 Orio, P. & Latorre, R. Differential effects of beta 1 and beta 2 subunits on BK channel  
995 activity. *J Gen Physiol* **125**, 395-411 (2005). <https://doi.org/10.1085/jgp.200409236>
- 996 36 Nimigean, C. M. & Magleby, K. L. Functional coupling of the beta(1) subunit to the  
997 large conductance Ca(2+)-activated K(+) channel in the absence of Ca(2+). Increased  
998 Ca(2+) sensitivity from a Ca(2+)-independent mechanism. *J Gen Physiol* **115**, 719-736  
999 (2000). <https://doi.org/10.1085/jgp.115.6.719>
- 1000 37 Ma, Z., Lou, X. J. & Horrigan, F. T. Role of charged residues in the S1-S4 voltage sensor  
1001 of BK channels. *J Gen Physiol* **127**, 309-328 (2006).  
1002 <https://doi.org/10.1085/jgp.200509421>
- 1003 38 Carrasquel-Ursulaez, W. *et al.* Mechanism of voltage sensing in Ca(2+)- and voltage-  
1004 activated K(+) (BK) channels. *Proc Natl Acad Sci U S A* **119**, e2204620119 (2022).  
1005 <https://doi.org/10.1073/pnas.2204620119>
- 1006 39 Cui, J. & Aldrich, R. W. Allosteric linkage between voltage and Ca(2+)-dependent  
1007 activation of BK-type mslo1 K(+) channels. *Biochemistry* **39**, 15612-15619 (2000).  
1008 <https://doi.org/10.1021/bi001509+>
- 1009 40 Carrasquel-Ursulaez, W. *et al.* Hydrophobic interaction between contiguous residues in  
1010 the S6 transmembrane segment acts as a stimuli integration node in the BK channel. *J*  
1011 *Gen Physiol* **145**, 61-74 (2015). <https://doi.org/10.1085/jgp.201411194>
- 1012 41 Chi, G. *et al.* Cryo-EM structure of the human Kv3.1 channel reveals gating control by  
1013 the cytoplasmic T1 domain. *Nat Commun* **13**, 4087 (2022).  
1014 <https://doi.org/10.1038/s41467-022-29594-w>
- 1015 42 Tian, Y., Heinemann, S. H. & Hoshi, T. Large-conductance Ca(2+)- and voltage-gated  
1016 K(+) channels form and break interactions with membrane lipids during each gating  
1017 cycle. *Proc Natl Acad Sci U S A* **116**, 8591-8596 (2019).  
1018 <https://doi.org/10.1073/pnas.1901381116>
- 1019 43 Fan, C. *et al.* Calcium-gated potassium channel blockade via membrane-facing  
1020 fenestrations. *Nat Chem Biol* (2023). <https://doi.org/10.1038/s41589-023-01406-2>
- 1021 44 Payandeh, J., Scheuer, T., Zheng, N. & Catterall, W. A. The crystal structure of a  
1022 voltage-gated sodium channel. *Nature* **475**, 353-358 (2011).  
1023 <https://doi.org/10.1038/nature10238>

- 1024 45 Natale, A. M., Deal, P. E. & Minor, D. L., Jr. Structural Insights into the Mechanisms and  
1025 Pharmacology of K(2P) Potassium Channels. *J Mol Biol* **433**, 166995 (2021).  
1026 <https://doi.org/10.1016/j.jmb.2021.166995>
- 1027 46 Ostmeyer, J., Chakrapani, S., Pan, A. C., Perozo, E. & Roux, B. Recovery from slow  
1028 inactivation in K<sup>+</sup> channels is controlled by water molecules. *Nature* **501**, 121-124  
1029 (2013). <https://doi.org/10.1038/nature12395>
- 1030 47 Haug, T., Olcese, R., Toro, L. & Stefani, E. Regulation of K<sup>+</sup> flow by a ring of negative  
1031 charges in the outer pore of BKCa channels. Part II: Neutralization of aspartate 292  
1032 reduces long channel openings and gating current slow component. *J Gen Physiol* **124**,  
1033 185-197 (2004). <https://doi.org/10.1085/jgp.200308950>
- 1034 48 Haug, T. *et al.* Regulation of K<sup>+</sup> flow by a ring of negative charges in the outer pore of  
1035 BKCa channels. Part I: Aspartate 292 modulates K<sup>+</sup> conduction by external surface  
1036 charge effect. *J Gen Physiol* **124**, 173-184 (2004). <https://doi.org/10.1085/jgp.200308949>
- 1037 49 Yan, J., Li, Q. & Aldrich, R. W. Closed state-coupled C-type inactivation in BK  
1038 channels. *Proc Natl Acad Sci U S A* **113**, 6991-6996 (2016).  
1039 <https://doi.org/10.1073/pnas.1607584113>
- 1040 50 Zhang, G. *et al.* Ion sensing in the RCK1 domain of BK channels. *Proc Natl Acad Sci U*  
1041 *S A* **107**, 18700-18705 (2010). <https://doi.org/10.1073/pnas.1010124107>
- 1042 51 Gagne, O. C. & Hawthorne, F. C. Bond-length distributions for ions bonded to oxygen:  
1043 alkali and alkaline-earth metals. *Acta Crystallogr B Struct Sci Cryst Eng Mater* **72**, 602-  
1044 625 (2016). <https://doi.org/10.1107/S2052520616008507>
- 1045 52 Zhou, Y., Zeng, X. H. & Lingle, C. J. Barium ions selectively activate BK channels via  
1046 the Ca<sup>2+</sup>-bowl site. *Proc Natl Acad Sci U S A* **109**, 11413-11418 (2012).  
1047 <https://doi.org/10.1073/pnas.1204444109>
- 1048 53 Zeng, X. H., Xia, X. M. & Lingle, C. J. Divalent cation sensitivity of BK channel  
1049 activation supports the existence of three distinct binding sites. *J Gen Physiol* **125**, 273-  
1050 286 (2005). <https://doi.org/10.1085/jgp.200409239>
- 1051 54 Bao, L., Kaldany, C., Holmstrand, E. C. & Cox, D. H. Mapping the BKCa channel's  
1052 "Ca<sup>2+</sup> bowl": side-chains essential for Ca<sup>2+</sup> sensing. *J Gen Physiol* **123**, 475-489 (2004).  
1053 <https://doi.org/10.1085/jgp.200409052>
- 1054 55 Tao, X., Lee, A., Limapichat, W., Dougherty, D. A. & MacKinnon, R. A gating charge  
1055 transfer center in voltage sensors. *Science* **328**, 67-73 (2010).  
1056 <https://doi.org/10.1126/science.1185954>
- 1057 56 Lacroix, J. J. & Bezanilla, F. Control of a final gating charge transition by a hydrophobic  
1058 residue in the S2 segment of a K<sup>+</sup> channel voltage sensor. *Proc Natl Acad Sci U S A* **108**,  
1059 6444-6449 (2011). <https://doi.org/10.1073/pnas.1103397108>
- 1060 57 Starace, D. M. & Bezanilla, F. A proton pore in a potassium channel voltage sensor  
1061 reveals a focused electric field. *Nature* **427**, 548-553 (2004).  
1062 <https://doi.org/10.1038/nature02270>
- 1063 58 Chanda, B., Asamoah, O. K., Blunck, R., Roux, B. & Bezanilla, F. Gating charge  
1064 displacement in voltage-gated ion channels involves limited transmembrane movement.  
1065 *Nature* **436**, 852-856 (2005). <https://doi.org/10.1038/nature03888>
- 1066 59 Posson, D. J., Ge, P., Miller, C., Bezanilla, F. & Selvin, P. R. Small vertical movement of  
1067 a K<sup>+</sup> channel voltage sensor measured with luminescence energy transfer. *Nature* **436**,  
1068 848-851 (2005). <https://doi.org/10.1038/nature03819>

- 1069 60 Sun, L. & Horrigan, F. T. A gating lever and molecular logic gate that couple voltage and  
1070 calcium sensor activation to opening in BK potassium channels. *Sci Adv* **8**, eabq5772  
1071 (2022). <https://doi.org/10.1126/sciadv.abq5772>
- 1072 61 Zhang, G. *et al.* A charged residue in S4 regulates coupling among the activation gate,  
1073 voltage, and Ca<sup>2+</sup> sensors in BK channels. *J Neurosci* **34**, 12280-12288 (2014).  
1074 <https://doi.org/10.1523/JNEUROSCI.1174-14.2014>
- 1075 62 Shi, J. *et al.* Mechanism of magnesium activation of calcium-activated potassium  
1076 channels. *Nature* **418**, 876-880 (2002). <https://doi.org/10.1038/nature00941>
- 1077 63 Yang, H. *et al.* Mg<sup>2+</sup> mediates interaction between the voltage sensor and cytosolic  
1078 domain to activate BK channels. *Proc Natl Acad Sci U S A* **104**, 18270-18275 (2007).  
1079 <https://doi.org/10.1073/pnas.0705873104>
- 1080 64 Yang, J. *et al.* Interaction between residues in the Mg<sup>2+</sup>-binding site regulates BK  
1081 channel activation. *J Gen Physiol* **141**, 217-228 (2013).  
1082 <https://doi.org/10.1085/jgp.201210794>
- 1083 65 Horrigan, F. T. & Ma, Z. Mg<sup>2+</sup> enhances voltage sensor/gate coupling in BK channels. *J*  
1084 *Gen Physiol* **131**, 13-32 (2008). <https://doi.org/10.1085/jgp.200709877>
- 1085 66 Carrasquel-Ursulaez, W., Alvarez, O., Bezanilla, F. & Latorre, R. Determination of the  
1086 Stoichiometry between alpha- and gamma1 Subunits of the BK Channel Using LRET.  
1087 *Biophys J* **114**, 2493-2497 (2018). <https://doi.org/10.1016/j.bpj.2018.04.008>
- 1088 67 Chen, G., Li, Q. & Yan, J. The leucine-rich repeat domains of BK channel auxiliary  
1089 gamma subunits regulate their expression, trafficking, and channel-modulation functions.  
1090 *J Biol Chem* **298**, 101664 (2022). <https://doi.org/10.1016/j.jbc.2022.101664>
- 1091 68 Parcej, D., Guntrum, R., Schmidt, S., Hinz, A. & Tampe, R. Multicolour fluorescence-  
1092 detection size-exclusion chromatography for structural genomics of membrane  
1093 multiprotein complexes. *PLoS One* **8**, e67112 (2013).  
1094 <https://doi.org/10.1371/journal.pone.0067112>
- 1095 69 Morales-Perez, C. L., Noviello, C. M. & Hibbs, R. E. Manipulation of Subunit  
1096 Stoichiometry in Heteromeric Membrane Proteins. *Structure* **24**, 797-805 (2016).  
1097 <https://doi.org/10.1016/j.str.2016.03.004>
- 1098 70 Killian, J. A. & von Heijne, G. How proteins adapt to a membrane-water interface.  
1099 *Trends Biochem Sci* **25**, 429-434 (2000). [https://doi.org/10.1016/s0968-0004\(00\)01626-1](https://doi.org/10.1016/s0968-0004(00)01626-1)
- 1100 71 Granseth, E., von Heijne, G. & Elofsson, A. A study of the membrane-water interface  
1101 region of membrane proteins. *J Mol Biol* **346**, 377-385 (2005).  
1102 <https://doi.org/10.1016/j.jmb.2004.11.036>
- 1103 72 Li, Q., Guan, X., Yen, K., Zhang, J. & Yan, J. The single transmembrane segment  
1104 determines the modulatory function of the BK channel auxiliary gamma subunit. *J Gen*  
1105 *Physiol* **147**, 337-351 (2016). <https://doi.org/10.1085/jgp.201511551>
- 1106 73 Guan, X., Li, Q. & Yan, J. Relationship between auxiliary gamma subunits and  
1107 mallotoxin on BK channel modulation. *Sci Rep* **7**, 42240 (2017).  
1108 <https://doi.org/10.1038/srep42240>
- 1109 74 Colquhoun, D. Binding, gating, affinity and efficacy: the interpretation of structure-  
1110 activity relationships for agonists and of the effects of mutating receptors. *Br J*  
1111 *Pharmacol* **125**, 924-947 (1998). <https://doi.org/10.1038/sj.bjp.0702164>
- 1112 75 Gonzalez-Perez, V., Ben Johny, M., Xia, X. M. & Lingle, C. J. Regulatory gamma1  
1113 subunits defy symmetry in functional modulation of BK channels. *Proc Natl Acad Sci U*  
1114 *S A* **115**, 9923-9928 (2018). <https://doi.org/10.1073/pnas.1804560115>

- 1115 76 Gonzalez-Perez, V., Xia, X. M. & Lingle, C. J. Functional regulation of BK potassium  
1116 channels by gamma auxiliary subunits. *Proc Natl Acad Sci U S A* **111**, 4868-4873  
1117 (2014). <https://doi.org/10.1073/pnas.1322123111>
- 1118 77 Olerinyova, A. *et al.* Mass Photometry of Membrane Proteins. *Chem* **7**, 224-236 (2021).  
1119 <https://doi.org/10.1016/j.chempr.2020.11.011>
- 1120 78 Gessner, G. *et al.* BKCa channels activating at resting potential without calcium in  
1121 LNCaP prostate cancer cells. *J Membr Biol* **208**, 229-240 (2005).  
1122 <https://doi.org/10.1007/s00232-005-0830-z>
- 1123 79 Gonzalez-Perez, V., Xia, X. M. & Lingle, C. J. Two classes of regulatory subunits  
1124 coassemble in the same BK channel and independently regulate gating. *Nat Commun* **6**,  
1125 8341 (2015). <https://doi.org/10.1038/ncomms9341>
- 1126 80 Pantazis, A. & Olcese, R. Relative transmembrane segment rearrangements during BK  
1127 channel activation resolved by structurally assigned fluorophore-quencher pairing. *J Gen*  
1128 *Physiol* **140**, 207-218 (2012). <https://doi.org/10.1085/jgp.201210807>
- 1129 81 Miranda, P., Holmgren, M. & Giraldez, T. Voltage-dependent dynamics of the BK  
1130 channel cytosolic gating ring are coupled to the membrane-embedded voltage sensor.  
1131 *Elife* **7** (2018). <https://doi.org/10.7554/eLife.40664>
- 1132 82 Miranda, P. *et al.* State-dependent FRET reports calcium- and voltage-dependent gating-  
1133 ring motions in BK channels. *Proc Natl Acad Sci U S A* **110**, 5217-5222 (2013).  
1134 <https://doi.org/10.1073/pnas.1219611110>
- 1135 83 Zhou, Y., Xia, X. M. & Lingle, C. J. Cysteine scanning and modification reveal major  
1136 differences between BK channels and Kv channels in the inner pore region. *Proc Natl*  
1137 *Acad Sci U S A* **108**, 12161-12166 (2011). <https://doi.org/10.1073/pnas.1104150108>
- 1138 84 Zhou, Y., Xia, X. M. & Lingle, C. J. Cadmium-cysteine coordination in the BK inner  
1139 pore region and its structural and functional implications. *Proc Natl Acad Sci U S A* **112**,  
1140 5237-5242 (2015). <https://doi.org/10.1073/pnas.1500953112>
- 1141 85 Li, Q. *et al.* Structural mechanism of voltage-dependent gating in an isolated voltage-  
1142 sensing domain. *Nat Struct Mol Biol* **21**, 244-252 (2014).  
1143 <https://doi.org/10.1038/nsmb.2768>
- 1144 86 Shen, R., Meng, Y., Roux, B. & Perozo, E. Mechanism of voltage gating in the voltage-  
1145 sensing phosphatase Ci-VSP. *Proc Natl Acad Sci U S A* **119**, e2206649119 (2022).  
1146 <https://doi.org/10.1073/pnas.2206649119>
- 1147 87 Stefani, E. *et al.* Voltage-controlled gating in a large conductance Ca<sup>2+</sup>-sensitive  
1148 K<sup>+</sup>-channel (hslo). *Proc Natl Acad Sci U S A* **94**, 5427-5431 (1997).  
1149 <https://doi.org/10.1073/pnas.94.10.5427>
- 1150 88 Chanda, B. & Bezanilla, F. A common pathway for charge transport through voltage-  
1151 sensing domains. *Neuron* **57**, 345-351 (2008).  
1152 <https://doi.org/10.1016/j.neuron.2008.01.015>
- 1153 89 Kintzer, A. F. *et al.* Structural basis for activation of voltage sensor domains in an ion  
1154 channel TPC1. *Proc Natl Acad Sci U S A* **115**, E9095-E9104 (2018).  
1155 <https://doi.org/10.1073/pnas.1805651115>
- 1156 90 Mandala, V. S. & MacKinnon, R. Voltage-sensor movements in the Eag Kv channel  
1157 under an applied electric field. *Proc Natl Acad Sci U S A* **119**, e2214151119 (2022).  
1158 <https://doi.org/10.1073/pnas.2214151119>
- 1159 91 Wang, Y. W., Ding, J. P., Xia, X. M. & Lingle, C. J. Consequences of the stoichiometry  
1160 of Slo1 alpha and auxiliary beta subunits on functional properties of large-conductance

- 1161 Ca<sup>2+</sup>-activated K<sup>+</sup> channels. *J Neurosci* **22**, 1550-1561 (2002).  
1162 [https://doi.org:10.1523/JNEUROSCI.22-05-01550.2002](https://doi.org/10.1523/JNEUROSCI.22-05-01550.2002)
- 1163 92 Punjani, A., Rubinstein, J. L., Fleet, D. J. & Brubaker, M. A. cryoSPARC: algorithms for  
1164 rapid unsupervised cryo-EM structure determination. *Nat Methods* **14**, 290-296 (2017).  
1165 [https://doi.org:10.1038/nmeth.4169](https://doi.org/10.1038/nmeth.4169)
- 1166 93 Zivanov, J. *et al.* New tools for automated high-resolution cryo-EM structure  
1167 determination in RELION-3. *Elife* **7** (2018). [https://doi.org:10.7554/eLife.42166](https://doi.org/10.7554/eLife.42166)
- 1168 94 Chen, V. B. *et al.* MolProbity: all-atom structure validation for macromolecular  
1169 crystallography. *Acta Crystallogr D Biol Crystallogr* **66**, 12-21 (2010).  
1170 [https://doi.org:10.1107/S0907444909042073](https://doi.org/10.1107/S0907444909042073)
- 1171 95 Zhou, Y., Xia, X. M. & Lingle, C. J. The functionally relevant site for paxilline inhibition  
1172 of BK channels. *Proc Natl Acad Sci U S A* **117**, 1021-1026 (2020).  
1173 [https://doi.org:10.1073/pnas.1912623117](https://doi.org/10.1073/pnas.1912623117)
- 1174
